# Supplementary material for: Clinical Value of Circulating miRNA in Diagnosis, Prognosis, Screening and Monitoring Therapy of Pancreatic Ductal Adenocarcinoma—A Review of the Literature
Source: MDPI journal article supplement (doi:10.3390/ijms24065113), 2023-03-07
Supplement: s1 [file s1]

**Supplementary Table S1.** Characteristics of classic diagnostic methods of pancreatic ductal adenocarcinoma. [1]

| Diagnostic tool                   | Advantages                                                                                                                                                                                                                                       | Disadvantages                                                                                                                                                            |
|-----------------------------------|--------------------------------------------------------------------------------------------------------------------------------------------------------------------------------------------------------------------------------------------------|--------------------------------------------------------------------------------------------------------------------------------------------------------------------------|
| Transabdominal ultrasound         | <ul style="list-style-type: none"> <li>• non-invasive</li> <li>• relatively cost-effective</li> </ul>                                                                                                                                            | <ul style="list-style-type: none"> <li>• difficulties in imaging of pancreatic body and tail cancers</li> <li>• highly dependent on the operator's experience</li> </ul> |
| Computed tomography               | <ul style="list-style-type: none"> <li>• non-invasive</li> <li>• good spatial resolution</li> <li>• good temporal resolution</li> <li>• wide anatomic coverage</li> <li>• best performance for the evaluation of vascular involvement</li> </ul> | <ul style="list-style-type: none"> <li>• may not depict small metastases to the liver or peritoneum</li> </ul>                                                           |
| EUS-guided fine-needle aspiration | <ul style="list-style-type: none"> <li>• high-resolution images of the pancreas</li> <li>• ability to obtain specimens for histopathological diagnosis</li> </ul>                                                                                | <ul style="list-style-type: none"> <li>• an invasive procedure, however considered safe and accurate</li> </ul>                                                          |
| Magnetic resonance imaging        | <ul style="list-style-type: none"> <li>• non-invasive</li> <li>• greater soft-tissue contrast of MRI compared with that of CT</li> </ul>                                                                                                         | <ul style="list-style-type: none"> <li>• worse spatial resolution compared to CT (requires relatively more time to perform the imaging)</li> </ul>                       |

**Supplementary Table S2.** Diagnostic performance of circulating miRNA (CS – clinical stage, PC-pancreatic cancer, CP-chronic pancreatitis, IPMN – intraductal papillary mucinous neoplasm AUC – area under the curve), 95% CI are provided in square brackets.

\*-analysis with Abcam Fireplex™ platform

† - provided with miRBase: the microRNA database

| miRNA  | Location and predicted target genes † | Author  | Year | Normalization control | Source of sample | Expression level compared to non-cancer controls | CS of PC patients | Control          | AUC   | Sensitivity | Specificity |
|--------|---------------------------------------|---------|------|-----------------------|------------------|--------------------------------------------------|-------------------|------------------|-------|-------------|-------------|
| miR-21 | chr17:                                | Abue et | 2015 | exogenous cel-        | plasma           | upregulated                                      | I-IV              | healthy patients | 0.736 | -           | -           |

|             |                                            |                     |      |                                                                                     |        |               |       |                              |                          |   |   |
|-------------|--------------------------------------------|---------------------|------|-------------------------------------------------------------------------------------|--------|---------------|-------|------------------------------|--------------------------|---|---|
|             | 59841266-59841337<br>[+] [82] [83]         | al.[84]             |      | miR-39,<br>endogenous<br>miR-16                                                     |        |               |       | and IPMN                     |                          |   |   |
| miR-483-3p  | chr11:<br>2134134-2134209 [-]<br>[137]     | Abue et al.[84]     | 2015 | exogenous cel-<br>miR-39,<br>endogenous<br>miR-16                                   | plasma | upregulated   | I-IV  | healthy patients<br>and IPMN | 0.740                    | - | - |
| miR-1202    | chr 6:<br>155946797-155946879<br>[15]      | Aita et al.<br>[16] | 2021 | exogenous<br>UniSp6,<br>exogenous<br>spike-in mix<br>(UniSp2,<br>UniSp4,<br>UniSp5) | serum  | downregulated | I-III | healthy patients             | 0.8833 [0.7246-1.00]     | - | - |
| miR-1275    | chr 6:<br>33999972-34000051 [-]<br>[25]    | Aita et al.<br>[16] | 2021 | exogenous<br>UniSp6,<br>exogenous<br>spike-in mix<br>(UniSp2,<br>UniSp4,<br>UniSp5) | serum  | downregulated | I-III | healthy patients             | 0.8333 [0.60049-1.00]    | - | - |
| miR-1915-3p | chr10:<br>21496562-21496641 [-]<br>[59]    | Aita et al.<br>[16] | 2021 | exogenous<br>UniSp6,<br>exogenous<br>spike-in mix<br>(UniSp2,<br>UniSp4,<br>UniSp5) | serum  | upregulated   | I-III | healthy patients             | 0.8833 [0.70258-1.00]    | - | - |
| miR-2392    | chr14:<br>100814491-100814574<br>[+] [105] | Aita et al.<br>[16] | 2021 | exogenous<br>UniSp6,<br>exogenous<br>spike-in mix<br>(UniSp2,<br>UniSp4,<br>UniSp5) | serum  | downregulated | I-III | healthy patients             | 0.8667 [0.75085-0.98249] | - | - |
| miR-3135-b  | chr6:<br>32749912-                         | Aita et al.<br>[16] | 2021 | exogenous<br>UniSp6,                                                                | serum  | upregulated   | I-III | healthy patients             | 0.8333 [0.70987-0.95680] | - | - |

|             |                                               |                     |      |                                                                                     |       |               |       |                  |                           |   |   |
|-------------|-----------------------------------------------|---------------------|------|-------------------------------------------------------------------------------------|-------|---------------|-------|------------------|---------------------------|---|---|
|             | 32749979 [-]<br>[115]                         |                     |      | exogenous<br>spike-in mix<br>(UniSp2,<br>UniSp4,<br>UniSp5)                         |       |               |       |                  |                           |   |   |
| miR-3679-5p | chr2:<br>134127125-<br>134127192<br>[+] [121] | Aita et al.<br>[16] | 2021 | exogenous<br>UniSp6,<br>exogenous<br>spike-in mix<br>(UniSp2,<br>UniSp4,<br>UniSp5) | serum | downregulated | I-III | healthy patients | 0.85 [0.6431-<br>1.00 ]   | - | - |
| miR-371b-5p | chr19:<br>53787677-<br>53787742 [-]<br>[122]  | Aita et al.<br>[16] | 2021 | exogenous<br>UniSp6,<br>exogenous<br>spike-in mix<br>(UniSp2,<br>UniSp4,<br>UniSp5) | serum | upregulated   | I-III | healthy patients | 0.9333 [0.84430-<br>1.00] | - | - |
| miR-4327    | chr21:<br>30375294-<br>30375378 [-]<br>[130]  | Aita et al.<br>[16] | 2021 | exogenous<br>UniSp6,<br>exogenous<br>spike-in mix<br>(UniSp2,<br>UniSp4,<br>UniSp5) | serum | upregulated   | I-III | healthy patients | 0.9333 [0.84430-<br>1.00] | - | - |
| miR-4466    | chr6:<br>156779678-<br>156779731<br>[-][131]  | Aita et al.<br>[16] | 2021 | exogenous<br>UniSp6,<br>exogenous<br>spike-in mix<br>(UniSp2,<br>UniSp4,<br>UniSp5) | serum | upregulated   | I-III | healthy patients | 0.8500 [0.58529-<br>1.00] | - | - |
| miR-4516    | chr16:<br>2133119-<br>2133204 [+] [132]       | Aita et al.<br>[16] | 2021 | exogenous<br>UniSp6,<br>exogenous<br>spike-in mix                                   | serum | upregulated   | I-III | healthy patients | 0.9167 [0.78255-<br>1.00] | - | - |

|             |                                               |                     |      |                                                                                     |       |               |       |                  |                              |   |   |
|-------------|-----------------------------------------------|---------------------|------|-------------------------------------------------------------------------------------|-------|---------------|-------|------------------|------------------------------|---|---|
|             |                                               |                     |      | (UniSp2,<br>UniSp4,<br>UniSp5)                                                      |       |               |       |                  |                              |   |   |
| miR-4655-3p | chr7:<br>1844180-<br>1844253 [-]<br>[134]     | Aita et al.<br>[16] | 2021 | exogenous<br>UniSp6,<br>exogenous<br>spike-in mix<br>(UniSp2,<br>UniSp4,<br>UniSp5) | serum | upregulated   | I-III | healthy patients | 0.8667 [0.75085-<br>0.98249] | - | - |
| miR-4669    | chr9:<br>134379411-<br>134379472<br>[+] [135] | Aita et al.<br>[16] | 2021 | exogenous<br>UniSp6,<br>exogenous<br>spike-in mix<br>(UniSp2,<br>UniSp4,<br>UniSp5) | serum | downregulated | I-III | healthy patients | 0.8333 [0.56959-<br>1.00]    | - | - |
| miR-4687-3p | chr11:<br>3856062-<br>3856141 [+] [136]       | Aita et al.<br>[16] | 2021 | exogenous<br>UniSp6,<br>exogenous<br>spike-in mix<br>(UniSp2,<br>UniSp4,<br>UniSp5) | serum | upregulated   | I-III | healthy patients | 0.8833 [0.70258-<br>1.00]    | - | - |
| miR-5100    | chr10:<br>42997563-<br>42997681<br>[+] [141]  | Aita et al.<br>[16] | 2021 | exogenous<br>UniSp6,<br>exogenous<br>spike-in mix<br>(UniSp2,<br>UniSp4,<br>UniSp5) | serum | upregulated   | I-III | healthy patients | 0.8667 [0.67646-<br>1.00]    | - | - |
| miR-574-3p  | chr4:<br>38868032-<br>38868127<br>[+] [142]   | Aita et al.<br>[16] | 2021 | exogenous<br>UniSp6,<br>exogenous<br>spike-in mix<br>(UniSp2,<br>UniSp4,<br>UniSp5) | serum | downregulated | I-III | healthy patients | 0.8333 [0.59329-<br>1.00]    | - | - |

|             |                                              |                     |      |                                                                                     |       |               |       |                  |                             |   |   |
|-------------|----------------------------------------------|---------------------|------|-------------------------------------------------------------------------------------|-------|---------------|-------|------------------|-----------------------------|---|---|
|             |                                              |                     |      | UniSp5)                                                                             |       |               |       |                  |                             |   |   |
| miR-6089    | chrX:<br>2609191-<br>2609254 [+] [145]       | Aita et al.<br>[16] | 2021 | exogenous<br>UniSp6,<br>exogenous<br>spike-in mix<br>(UniSp2,<br>UniSp4,<br>UniSp5) | serum | upregulated   | I-III | healthy patients | 0.8667 [0.63230-<br>1.00]   | - | - |
| miR-6125    | chr12:<br>62260359-<br>62260454<br>[+] [146] | Aita et al.<br>[16] | 2021 | exogenous<br>UniSp6,<br>exogenous<br>spike-in mix<br>(UniSp2,<br>UniSp4,<br>UniSp5) | serum | upregulated   | I-III | healthy patients | 0.8833 [0.67896-<br>1.00]   | - | - |
| miR-6126    | chr16:<br>3485381-<br>3485469 [-]<br>[147]   | Aita et al.<br>[16] | 2021 | exogenous<br>UniSp6,<br>exogenous<br>spike-in mix<br>(UniSp2,<br>UniSp4,<br>UniSp5) | serum | upregulated   | I-III | healthy patients | 0.90 [0.79524-<br>1.00]     | - | - |
| miR-6749-5p | chr11:<br>64902387-<br>64902455 [-]<br>[154] | Aita et al.<br>[16] | 2021 | exogenous<br>UniSp6,<br>exogenous<br>spike-in mix<br>(UniSp2,<br>UniSp4,<br>UniSp5) | serum | downregulated | I-III | healthy patients | 0.8667 [0.0858-<br>0.69858] | - | - |
| miR-6800-5p | chr19:<br>49832018-<br>49832099<br>[+] [155] | Aita et al.<br>[16] | 2021 | exogenous<br>UniSp6,<br>exogenous<br>spike-in mix<br>(UniSp2,<br>UniSp4,<br>UniSp5) | serum | upregulated   | I-III | healthy patients | 0.90 [0.74399-<br>1.00]     | - | - |
| miR-6821-5p | chr22:                                       | Aita et al.         | 2021 | exogenous                                                                           | serum | upregulated   | I-III | healthy patients | 0.9667 [0.88761-            | - | - |

|             |                                            |                     |      |                                                                                     |       |               |       |                  |                       |   |   |
|-------------|--------------------------------------------|---------------------|------|-------------------------------------------------------------------------------------|-------|---------------|-------|------------------|-----------------------|---|---|
|             | 49962866-49962939<br>[+] [156]             | [16]                |      | UniSp6,<br>exogenous<br>spike-in mix<br>(UniSp2,<br>UniSp4,<br>UniSp5)              |       |               |       |                  | 1.00]                 |   |   |
| miR-6850-5p | chr8:<br>144791931-144791991<br>[-] [157]  | Aita et al.<br>[16] | 2021 | exogenous<br>UniSp6,<br>exogenous<br>spike-in mix<br>(UniSp2,<br>UniSp4,<br>UniSp5) | serum | upregulated   | I-III | healthy patients | 0.9167 [0.77041-1.00] | - | - |
| miR-6869-5p | chr20:<br>1392900-1392961 [-]<br>[158]     | Aita et al.<br>[16] | 2021 | exogenous<br>UniSp6,<br>exogenous<br>spike-in mix<br>(UniSp2,<br>UniSp4,<br>UniSp5) | serum | upregulated   | I-III | healthy patients | 0.9167 [0.74206-1.00] | - | - |
| miR-7107-5p | chr12:<br>121444273-121444352<br>[-] [161] | Aita et al.<br>[16] | 2021 | exogenous<br>UniSp6,<br>exogenous<br>spike-in mix<br>(UniSp2,<br>UniSp4,<br>UniSp5) | serum | downregulated | I-III | healthy patients | 0.8333 [0.59329-1.00] | - | - |
| miR-7110-5p | chr3:<br>123161794-123161879<br>[+] [162]  | Aita et al.<br>[16] | 2021 | exogenous<br>UniSp6,<br>exogenous<br>spike-in mix<br>(UniSp2,<br>UniSp4,<br>UniSp5) | serum | downregulated | I-III | healthy patients | 0.8167 [0.55014-1.00] | - | - |
| miR-8485    | chr2:<br>50696172-50696262 [-]             | Aita et al.<br>[16] | 2021 | exogenous<br>UniSp6,<br>exogenous                                                   | serum | downregulated | I-III | healthy patients | 0.8833 [0.67896-1.00] | - | - |

|            |                                                   |                         |      |                                                                                     |       |             |       |                            |                           |       |       |
|------------|---------------------------------------------------|-------------------------|------|-------------------------------------------------------------------------------------|-------|-------------|-------|----------------------------|---------------------------|-------|-------|
|            | [167]                                             |                         |      | spike-in mix<br>(UniSp2,<br>UniSp4,<br>UniSp5)                                      |       |             |       |                            |                           |       |       |
| miR-939-5p | chr8:<br>144394149-<br>144394230<br>[-] [171]     | Aita et al.<br>[16]     | 2021 | exogenous<br>UniSp6,<br>exogenous<br>spike-in mix<br>(UniSp2,<br>UniSp4,<br>UniSp5) | serum | upregulated | I-III | healthy patients           | 0.90 [0.79524-<br>1.00]   | -     | -     |
| miR-181d   | chr19:<br>13874875-<br>13875011<br>[+] [50][51]   | Akamatsu<br>et al. [52] | 2016 | exogenous cel-<br>miR-39                                                            | serum | upregulated | I-IV  | autoimmune<br>pancreatitis | 0.882 [0.813 -<br>0.952]  | 81%   | 80%   |
| miR-193b   | chr16:<br>14303967-<br>14304049<br>[+] [61] [62]  | Akamatsu<br>et al. [52] | 2016 | exogenous cel-<br>miR-39                                                            | serum | upregulated | I-IV  | autoimmune<br>pancreatitis | 0.804 [0.718 -<br>0.892]  | 79%   | 73%   |
| miR-34a    | chr1:<br>9151668-<br>9151777 [-]<br>[119][120]    | Akamatsu<br>et al. [52] | 2016 | exogenous cel-<br>miR-39                                                            | serum | upregulated | I-IV  | autoimmune<br>pancreatitis | 0.844 [ 0.754 -<br>0.935] | 81%   | 80%   |
| miR-7      | chr9:<br>83969748-<br>83969857 [-]<br>[159] [160] | Akamatsu<br>et al. [52] | 2016 | exogenous cel-<br>miR-39                                                            | serum | upregulated | I-IV  | autoimmune<br>pancreatitis | 0.723 [0.603 -<br>0.844]  | 72%   | 73%   |
| miR-21     | chr17:<br>59841266-<br>59841337<br>[+] [82] [83]  | Aleamar et<br>al. [85]  | 2016 | exogenous cel-<br>miR-39                                                            | serum | upregulated | I-IV  | healthy patients           | 0.889 [0.76–1.00]         | 82.6% | 77.8% |
| miR-34a    | chr1:<br>9151668-<br>9151777 [-]<br>[119][120]    | Aleamar et<br>al. [85]  | 2016 | exogenous cel-<br>miR-39                                                            | serum | upregulated | I-IV  | healthy patients           | 0.865 [0.71–<br>1.00]     | 91.3% | 77.8% |
| miR-196b   | chr7:                                             | Bartsch et              | 2018 | endogenous                                                                          | serum | upregulated | I-III | healthy patients           | 0.8938 [0.7395-           | 80%   | 50%   |

|              |                                                 |                     |      |                                                  |        |             |      |                         |                     |        |        |
|--------------|-------------------------------------------------|---------------------|------|--------------------------------------------------|--------|-------------|------|-------------------------|---------------------|--------|--------|
|              | 27169480-27169563 [-]<br>[66][67]               | al. [68]            |      | miR-24                                           |        |             |      |                         | 1.048]              |        |        |
| miR-182      | chr7:<br>129770383-129770492<br>[-] [53] [54]   | Chen et al.<br>[55] | 2014 | endogenous<br>RNU6B                              | plasma | upregulated | I-IV | healthy patients,<br>CP | 0.775 [0.721–0.856] | 64.1 % | 82.6 % |
| miR -106b    | chr 7:<br>100093993-100094074<br>[6]            | Cote et al.<br>[7]  | 2014 | endogenous<br>miRNA-425-5p                       | plasma | upregulated | I-IV | healthy patients,<br>CP | 0.999               | 100%   | 98%    |
| miR-10b      | chr 2:<br>176150303-176150412<br>[13][14]       | Cote et al.<br>[7]  | 2014 | endogenous<br>miRNA-425-5p                       | plasma | upregulated | I-IV | healthy patients,<br>CP | 0.980               | 95%    | 100%   |
| miR-155      | chr21:<br>25573980-25574044<br>[+] [34][35]     | Cote et al.<br>[7]  | 2014 | endogenous<br>miRNA-425-5p                       | plasma | upregulated | I-IV | healthy patients,<br>CP | 0.975               | 93%    | 100%   |
| miR-212      | chr17:<br>2050271-2050380 [-]<br>[89] [90]      | Cote et al.<br>[7]  | 2014 | endogenous<br>miRNA-425-5p                       | plasma | upregulated | I-IV | healthy patients,<br>CP | 0.900               | 90%    | 83%    |
| miR-30c      | chr1:<br>40757284-40757372<br>[+] [113][114]    | Cote et al.<br>[7]  | 2014 | endogenous<br>miRNA-425-5p                       | plasma | upregulated | I-IV | healthy patients,<br>CP | 0.938               | 73%    | 96%    |
| miR-25       | chr7:<br>100093560-100093643<br>[-] [107] [108] | Deng et al.[109]    | 2016 | directly<br>normalized to<br>the serum<br>volume | serum  | upregulated | I-IV | healthy patients,<br>CP | 0.915 [0.893-0.937] | -      | -      |
| miR-130a-3p* | chr11:<br>57641198-57641286                     | Dittmar et al. [29] | 2021 | endogenous<br>miR-17-5p,<br>miR-20a-5p,          | plasma | upregulated | II   | healthy patients        | 0.74 [0.63-0.84]    | -      | -      |



|             |                                                |                        |      |                                                            |        |               |      |                                                                         |                   |     |     |
|-------------|------------------------------------------------|------------------------|------|------------------------------------------------------------|--------|---------------|------|-------------------------------------------------------------------------|-------------------|-----|-----|
|             | [+][28]                                        |                        |      | miR-93-5p                                                  |        |               |      |                                                                         |                   |     |     |
| miR-222-3p* | chrX:<br>45747015-<br>45747124 [-]<br>[97]     | Dittmar et<br>al. [29] | 2021 | endogenous<br>miR-17-5p,<br>miR-20a-5p,<br>miR-93-5p       | plasma | upregulated   | II   | healthy patients                                                        | 0.70 [0.58-0.81]  | -   | -   |
| miR-34a-5p* | chr1:<br>9151668-<br>9151777 [-]<br>[119][120] | Dittmar et<br>al. [29] | 2021 | endogenous<br>miR-17-5p,<br>miR-20a-5p,<br>miR-93-5p       | plasma | upregulated   | II   | healthy patients                                                        | 0.77 [0.66- 0.87] | -   | -   |
| miR-642     |                                                | Fathi et al.<br>[151]  | 2022 | endogenous<br>RNU6B                                        | plasma | upregulated   | -    | patients with<br>gastrointestinal<br>symptoms,<br>without<br>malignancy | 0.63              | 58% | 78% |
| miR-8073    | chr13:<br>110340958-<br>110341029<br>[+] [166] | Fathi et al.<br>[151]  | 2022 | endogenous<br>RNU6B                                        | plasma | upregulated   | -    | patients with<br>gastrointestinal<br>symptoms,<br>without<br>malignancy | 0.82              | 77% | 78% |
| let-7d-3p   | chr 9:<br>94178834-<br>94178920<br>[4]         | Franklin et<br>al [5]  | 2018 | endogenous<br>mean<br>expression<br>value<br>normalization | plasma | upregulated   | I-II | healthy patients                                                        | 0.75 [0.61-0.89]  | -   | -   |
| miR-101-3p  | chr 1:<br>65058434-<br>65058508<br>[10]        | Franklin et<br>al [5]  | 2018 | endogenous<br>mean<br>expression<br>value<br>normalization | plasma | downregulated | I-II | healthy patients                                                        | 0.75 [0.60-0.89]  | -   | -   |
| miR-106b-5p | chr 7:<br>100093993-<br>100094074<br>[6]       | Franklin et<br>al [5]  | 2018 | endogenous<br>mean<br>expression<br>value<br>normalization | plasma | downregulated | I-II | healthy patients                                                        | 0.81 [0.68-0.94]  | -   | -   |
| miR-122-5p  | chr 18:<br>58451074-                           | Franklin et<br>al [5]  | 2018 | endogenous<br>mean                                         | plasma | upregulated   | I-II | healthy patients                                                        | 0.75 [0.60-0.89]  | -   | -   |

|             |                                              |                       |      |                                                            |        |               |      |                  |                  |   |   |
|-------------|----------------------------------------------|-----------------------|------|------------------------------------------------------------|--------|---------------|------|------------------|------------------|---|---|
|             | 58451158<br>[17]                             |                       |      | expression<br>value<br>normalization                       |        |               |      |                  |                  |   |   |
| miR-130b-3p | chr11:<br>57641198-<br>57641286<br>[+][28]   | Franklin et<br>al [5] | 2018 | endogenous<br>mean<br>expression<br>value<br>normalization | plasma | upregulated   | I-II | healthy patients | 0.80 [0.67-0.92] | - | - |
| miR-144-3p  | chr17:<br>28861533-<br>28861618 [-]<br>[33]  | Franklin et<br>al [5] | 2018 | endogenous<br>mean<br>expression<br>value<br>normalization | plasma | downregulated | I-II | healthy patients | 0.81 [0.68-0.94] | - | - |
| miR-197-3p  | chr1:<br>109598893-<br>109598967<br>[+] [69] | Franklin et<br>al [5] | 2018 | endogenous<br>mean<br>expression<br>value<br>normalization | plasma | upregulated   | I-II | healthy patients | 0.76 [0.62-0.90] | - | - |
| miR-22-5p   | chr17:<br>1713903-<br>1713987 [-]<br>[104]   | Franklin et<br>al [5] | 2018 | endogenous<br>mean<br>expression<br>value<br>normalization | plasma | upregulated   | I-II | healthy patients | 0.78 [0.64-0.92] | - | - |
| miR-24-3p   | chr9:<br>95086021-<br>95086088<br>[+] [106]  | Franklin et<br>al [5] | 2018 | endogenous<br>mean<br>expression<br>value<br>normalization | plasma | upregulated   | I-II | healthy patients | 0.78 [0.65-0.92] | - | - |
| miR-26a-5p  | chr3:<br>37969404-<br>37969480<br>[+] [111]  | Franklin et<br>al [5] | 2018 | endogenous<br>mean<br>expression<br>value<br>normalization | plasma | downregulated | I-II | healthy patients | 0.77 [0.62-0.91] | - | - |
| miR-34a-5p  | chr1:<br>9151668-<br>9151777 [-]             | Franklin et<br>al [5] | 2018 | endogenous<br>mean<br>expression                           | plasma | upregulated   | I-II | healthy patients | 0.82 [0.69-0.94] | - | - |

|             |                                              |                          |      |                                                            |        |               |         |                  |                  |       |       |
|-------------|----------------------------------------------|--------------------------|------|------------------------------------------------------------|--------|---------------|---------|------------------|------------------|-------|-------|
|             | [119][120]                                   |                          |      | value<br>normalization                                     |        |               |         |                  |                  |       |       |
| miR-423-3p  | chr17:<br>30117079-<br>30117172<br>[+] [127] | Franklin et<br>al [5]    | 2018 | endogenous<br>mean<br>expression<br>value<br>normalization | plasma | upregulated   | I-II    | healthy patients | 0.76 [0.62-0.90] | -     | -     |
| miR-451a    | chr17:<br>28861369-<br>28861440 [-]<br>[133] | Franklin et<br>al [5]    | 2018 | endogenous<br>mean<br>expression<br>value<br>normalization | plasma | downregulated | I-II    | healthy patients | 0.77 [0.63-0.91] | -     | -     |
| miR-574-3p  | chr4:<br>38868032-<br>38868127<br>[+] [142]  | Franklin et<br>al [5]    | 2018 | endogenous<br>mean<br>expression<br>value<br>normalization | plasma | upregulated   | I-II    | healthy patients | 0.83[0.70-0.95]  | -     | -     |
| miR-885-5p  | chr3:<br>10394489-<br>10394562 [-]<br>[168]  | Franklin et<br>al [5]    | 2018 | endogenous<br>mean<br>expression<br>value<br>normalization | plasma | upregulated   | I-II    | healthy patients | 0.79 [0.66-0.93] | -     | -     |
| miR-22-3p   | chr17:<br>1713903-<br>1713987 [-]<br>[101]   | Ganepola<br>et al. [102] | 2014 | endogenous<br>miR-3196                                     | plasma | upregulated   | IIA-IIB | healthy patients | 0.86 [0.70-1.00] | -     | -     |
| miR-642b-3p | chr19:<br>45674932-<br>45675008 [-]<br>[152] | Ganepola<br>et al. [102] | 2014 | endogenous<br>miR-3196                                     | plasma | upregulated   | IIA-IIB | healthy patients | 0.79 [0.59-0.98] | -     | -     |
| miR-885-5p  | chr3:<br>10394489-<br>10394562 [-]<br>[168]  | Ganepola<br>et al. [102] | 2014 | endogenous<br>miR-3196                                     | plasma | upregulated   | IIA-IIB | healthy patients | 0.84 [0.68-1.00] | -     | -     |
| miR-373     | chr19:<br>53788705-                          | Hua et<br>al.[125]       | 2017 | endogenous<br>RNU6B                                        | serum  | downregulated | I-IV    | healthy patients | 0.852            | 80.6% | 84.3% |

|             |                                              |                        |      |                          |        |               |               |                  |                         |        |        |
|-------------|----------------------------------------------|------------------------|------|--------------------------|--------|---------------|---------------|------------------|-------------------------|--------|--------|
|             | 53788773<br>[+]<br>[123][124]                |                        |      |                          |        |               |               |                  |                         |        |        |
| miR-429     | chr1:<br>1169005-<br>1169087 [+]<br>[128]    | Huang et<br>al.[129]   | 2022 | endogenous<br>RNU6B      | serum  | downregulated | I-IV          | healthy patients | 0.858 [0.727-<br>0.989] | -      | -      |
| miR-22-3p   | chr17:<br>1713903-<br>1713987 [-]<br>[101]   | Hussein et<br>al.[103] | 2017 | endogenous<br>miR-3196   | serum  | upregulated   | IB,IIB,I<br>V | healthy patients | 0.943                   | 97.14% | 93.33% |
| miR-642b-3p | chr19:<br>45674932-<br>45675008 [-]<br>[152] | Hussein et<br>al.[103] | 2017 | endogenous<br>miR-3196   | serum  | upregulated   | IB,IIB,I<br>V | healthy patients | 1.00                    | 100%   | 100%   |
| miR-885-5p  | chr3:<br>10394489-<br>10394562 [-]<br>[168]  | Hussein et<br>al.[103] | 2017 | endogenous<br>miR-3196   | serum  | upregulated   | IB,IIB,I<br>V | healthy patients | 1.00                    | 100%   | 100%   |
| miR-107     | chr 10:<br>89592747-<br>89592827<br>[11]     | Imamura et<br>al.[12]  | 2017 | exogenous cel-<br>miR-39 | plasma | downregulated | I-IV          | healthy patients | 0.851                   | 82%    | 68.8%  |
| miR-607     | chr10:<br>96828669-<br>96828764 [-]<br>[143] | Jiang et al.<br>[144]  | 2021 | endogenous<br>RNU6       | serum  | downregulated | I-IV          | healthy patients | 0.785 [0.738-<br>0.831] | 64.7%  | 77.2%  |
| miR-126-5p  | chr 9:<br>136670602-<br>136670686<br>[+][23] | Karasek et<br>al. [24] | 2018 | endogenous<br>miR-106a   | plasma | upregulated   | I-II          | healthy patients | 0.85                    | -      | -      |
| miR-1290    | chr1:<br>18897071-<br>18897148 [-]<br>[26]   | Karasek et<br>al. [24] | 2018 | endogenous<br>miR-106a   | plasma | upregulated   | I-II          | healthy patients | 0.78                    | -      | -      |
| miR-155     | chr21:                                       | Karasek et             | 2018 | endogenous               | plasma | upregulated   | I-II          | healthy patients | 0.86                    | -      | -      |

|            |                                                  |                         |      |                        |        |               |      |                  |                         |     |     |
|------------|--------------------------------------------------|-------------------------|------|------------------------|--------|---------------|------|------------------|-------------------------|-----|-----|
|            | 25573980-<br>25574044<br>[+] [34][35]            | al. [24]                |      | miR-106a               |        |               |      |                  |                         |     |     |
| miR-17-5p  | chr13:<br>91350605-<br>91350688<br>[+] [41]      | Karasek et<br>al. [24]  | 2018 | endogenous<br>miR-106a | plasma | upregulated   | I-II | healthy patients | 0.87                    | -   | -   |
| miR-21-5p  | chr17:<br>59841266-<br>59841337<br>[+] [82] [83] | Karasek et<br>al. [24]  | 2018 | endogenous<br>miR-106a | plasma | upregulated   | I-II | healthy patients | 0.99                    | -   | -   |
| miR-375    | chr2:<br>219001645-<br>219001708<br>[-][126]     | Karasek et<br>al. [24]  | 2018 | endogenous<br>miR-106a | plasma | upregulated   | I-II | healthy patients | 0.73                    | -   | -   |
| miR-221    | chrX:<br>45746157-<br>45746266 [-]<br>[94][95]   | Kawaguchi<br>et al.[96] | 2013 |                        | plasma | upregulated   | I-IV | healthy patients | 0.743                   | -   | -   |
| miR-122-5p | chr 18:<br>58451074-<br>58451158<br>[17]         | Khan et<br>al.[18]      | 2021 | exogenous<br>UniSp6    | serum  | upregulated   | I-IV | healthy patients | 0.988 [0.927–<br>0.999] | 98% | 96% |
| miR-192-5p | chr11:<br>64891137-<br>64891246 [-]<br>[60]      | Khan et<br>al.[18]      | 2021 | exogenous<br>UniSp6    | serum  | upregulated   | I-IV | healthy patients | 0.720 [0.604–<br>0.817] | 74% | 60% |
| miR-215-5p | chr1:<br>220117853-<br>220117962<br>[-] [91]     | Khan et<br>al.[18]      | 2021 | exogenous<br>UniSp6    | serum  | upregulated   | I-IV | healthy patients | 0.832 [0.721–<br>0.904] | 72% | 72% |
| miR-30b-5p | chr8:<br>134800520-<br>134800607<br>[-] [112]    | Khan et<br>al.[18]      | 2021 | exogenous<br>UniSp6    | serum  | downregulated | I-IV | healthy patients | 0.798 [0.691–<br>0.883] | 76% | 68% |
| miR-320b   | chr1:                                            | Khan et                 | 2021 | exogenous              | serum  | upregulated   | I-IV | healthy patients | 0.922 [0.833–           | 84% | 78% |

|          |                                              |                     |      |                      |        |               |      |                      |                     |       |       |
|----------|----------------------------------------------|---------------------|------|----------------------|--------|---------------|------|----------------------|---------------------|-------|-------|
|          | 116671746-116671817<br>[+] [117]             | al.[18]             |      | UniSp6               |        |               |      |                      | 0.970]              |       |       |
| miR-223  | chrX:<br>66018870-66018979<br>[+] [98] [99]  | Komatsu et al.[100] | 2015 | exogenous cel-miR-39 | plasma | upregulated   | I-II | healthy patients     | 0.8340              | 62%   | 94.1% |
| miR-200a | chr1:<br>1167863-1167952<br>[+] [72][73]     | Li et al.[74]       | 2010 | endogenous miR-16    | serum  | upregulated   | -    | healthy patients     | 0.861 [0.774–0.949] | 84.4% | 87.5% |
| miR-200b | chr1:<br>1167104-1167198<br>[+] [75] [76]    | Li et al.[74]       | 2010 | endogenous miR-16    | serum  | upregulated   | -    | healthy patients     | 0.85 [0.763–0.938]  | 71.1% | 96.9% |
| miR-492  | chr12:<br>94834398-94834513<br>[+] [139]     | Lin et al.[140]     | 2014 | exogenous cel-miR-39 | serum  | downregulated | I-IV | healthy patients     | 0.787 [0.689-0.885] | 75.5% | 70.0% |
| miR-663a | chr20:<br>26208186-26208278<br>[-] [153]     | Lin et al.[140]     | 2014 | exogenous cel-miR-39 | serum  | downregulated | I-IV | healthy patients     | 0.870 [0.793-0.948] | 85.7% | 80.0% |
| miR-196a | chr17:<br>48632490-48632559<br>[-] [64]      | Liu et al. [46]     | 2020 | endogenous RNU6B     | plasma | upregulated   | I-IV | healthy patients     | 0.865 [0.779-0.951] | 72.5% | 92.5% |
| miR-155  | chr21:<br>25573980-25574044<br>[+] [34][35]  | Liu et al. [36]     | 2012 | exogenous cel-miR-39 | plasma | upregulated   | I-IV | healthy patients, CP | 0.704 [0.646-0.762] | -     | -     |
| miR-16   | chr13:<br>50048973-50049061<br>[-] [39] [40] | Liu et al. [36]     | 2012 | exogenous cel-miR-39 | plasma | upregulated   | I-IV | healthy patients, CP | 0.749 [0.694-0.803] | -     | -     |
| miR-181b | chr1:                                        | Liu et al.          | 2012 | exogenous cel-       | plasma | upregulated   | I-IV | healthy patients,    | 0.785 [0.735-       | -     | -     |

|          |                                          |                      |      |                      |        |             |      |                      |                     |       |       |
|----------|------------------------------------------|----------------------|------|----------------------|--------|-------------|------|----------------------|---------------------|-------|-------|
|          | 198858873-198858982 [-] [44][45]         | [36]                 |      | miR-39               |        |             |      | CP                   | 0.835]              |       |       |
| miR-196a | chr17: 48632490-48632559 [-] [64]        | Liu et al. [36]      | 2012 | exogenous cel-miR-39 | plasma | upregulated | I-IV | healthy patients, CP | 0.816 [0.768-0.864] | -     | -     |
| miR-21   | chr17: 59841266-59841337 [+] [82] [83]   | Liu et al. [36]      | 2012 | exogenous cel-miR-39 | plasma | upregulated | I-IV | healthy patients, CP | 0.776 [0.725-0.827] | -     | -     |
| miR-210  | chr11: 568089-568198 [-] [87][88]        | Liu et al. [36]      | 2012 | exogenous cel-miR-39 | plasma | upregulated | I-IV | healthy patients, CP | 0.755 [0.701-0.808] | -     | -     |
| miR-181b | chr1: 198858873-198858982 [-] [44][45]   | Liu et al. [46]      | 2020 | endogenous RNU6B     | plasma | upregulated | I-IV | healthy patients     | 0.789 [0.681-0.898] | 77.5% | 85.0% |
| miR-210  | chr11: 568089-568198 [-] [87][88]        | Liu et al. [46]      | 2020 | endogenous RNU6B     | plasma | upregulated | I-IV | healthy patients     | 0.834 [0.745-0.923] | 82.5% | 80.0% |
| miR-181a | chr1: 198859044-198859153 [-] [42] [43]  | Liu J. et al. [36]   | 2012 | exogenous cel-miR-39 | plasma | upregulated | I-IV | healthy patients, CP | 0.774 [0.723-0.825] | -     | -     |
| miR-744  | chr17: 12081899-12081996 [+] [163] [164] | Miyamae et al.[165]  | 2015 | exogenous cel-miR-39 | plasma | upregulated | I-IV | healthy patients     | 0.8307              | 59.3% | 89.6% |
| miR-18a  | chr13: 91350751-91350821 [+] [56] [57]   | Morimura et al. [58] | 2011 |                      | plasma | upregulated | I-IV | healthy patients     | 0.9369              | -     | -     |

|           |                                                    |                       |      |                                      |       |             |         |                  |                        |      |     |
|-----------|----------------------------------------------------|-----------------------|------|--------------------------------------|-------|-------------|---------|------------------|------------------------|------|-----|
| miR-21-5p | chr17:<br>59841266-<br>59841337<br>[+] [82]        | Qu et<br>al.[92]      | 2017 | exogenous cel-<br>miR-39             | serum | upregulated | I-IV    | healthy patients | 0.78 [ 0.66–0.90]      | 77%  | 80% |
| miR-629   | chr15:<br>70079372-<br>70079468 [-]<br>[148] [149] | Shi et<br>al.[150]    | 2018 |                                      | serum | upregulated | I-IV    | healthy patients | 0.765<br>[0.679-0.851] | -    | -   |
| miR-196   |                                                    | Škrha et<br>al.[63]   | 2016 | endogenous<br>miR-191 and<br>miR-454 | serum | upregulated | -       | healthy patients | 0.74                   | -    | -   |
| miR-200   |                                                    | Škrha et<br>al.[63]   | 2016 | endogenous<br>miR-191 and<br>miR-454 | serum | upregulated | -       | healthy patients | 0.79                   | -    | -   |
| miR-196b  | chr7:<br>27169480-<br>27169563 [-]<br>[66][67]     | Slater et al.<br>[65] | 2014 | endogenous<br>miR-24                 | serum | upregulated | I,II,IV | healthy patients | 0.86                   | 100% | 78% |
| miR-196a  | chr17:<br>48632490-<br>48632559 [-]<br>[64]        | Slater et al.<br>[65] | 2014 | endogenous<br>miR-24                 | serum | upregulated | I,II,IV | healthy patients | 0.97                   | 90%  | 89% |
| miR-100   | chr 11:<br>122152229-<br>122152308<br>[8]          | Stroese et<br>al. [9] | 2018 | exogenous cel-<br>miR-39             | serum | upregulated | I-IV    | healthy patients | 0.81 [0.70-0.92]       | -    | -   |
| miR-21    | chr17:<br>59841266-<br>59841337<br>[+] [82] [83]   | Stroese et<br>al. [9] | 2018 | exogenous cel-<br>miR-39             | serum | upregulated | I-IV    | healthy patients | 0.71 [0.56-0.86]       | -    | -   |
| miR-99a   | chr21:<br>16539089-<br>16539169<br>[+] [172][173]  | Stroese et<br>al.[9]  | 2018 | exogenous cel-<br>miR-39             | serum | upregulated | I-IV    | healthy patients | 0.72 [0.59-0.86]       | -    | -   |
| miR-99b   | chr19:                                             | Stroese et            | 2018 | exogenous cel-                       | serum | upregulated | I-IV    | healthy patients | 0.76 [0.65-0.88]       | -    | -   |



|            |                                               |                         |      |                              |        |               |       |                            |                     |       |       |
|------------|-----------------------------------------------|-------------------------|------|------------------------------|--------|---------------|-------|----------------------------|---------------------|-------|-------|
|            | 51692612-51692681<br>[+]<br>[174][175]        | al.[9]                  |      | miR-39                       |        |               |       |                            |                     |       |       |
| miR-205    | chr1:<br>209432133-209432242<br>[+] [77] [78] | Traeger et al. [79]     | 2018 | exogenous cel-miR-39         | serum  | upregulated   | II-IV | healthy patients, CP, IPMN | 0.669 [0.548–0.789] | 64.3% | 68.4% |
| miR-181c   | chr19:<br>13874699-13874808<br>[+] [47] [48]  | Vieira et al. [49]      | 2021 | endogenous RNU-24 and RNU-48 | plasma | upregulated   | I-IV  | healthy patients           | 0.72                | -     | -     |
| miR-210    | chr11:<br>568089-568198 [-]<br>[87][88]       | Vieira et al. [49]      | 2021 | endogenous RNU-24 and RNU-48 | plasma | upregulated   | I-IV  | healthy patients           | 0.88                | -     | -     |
| miR-21-5p  | chr17:<br>59841266-59841337<br>[+] [82]       | Vila-Navarro et al.[93] | 2019 | exogenous cel-miR-39         | plasma | upregulated   | I-IV  | healthy patients           | 0.862 [0.834-0.890] | 62.4% | 73.5% |
| miR-320a   | chr8:<br>22244966-22245037 [-]<br>[116]       | Vila-Navarro et al.[93] | 2019 | exogenous cel-miR-39         | plasma | upregulated   | I-IV  | healthy patients           | 0.849 [0.819-0.879] | 83.0% | 78.4% |
| miR-33a-3p | chr22:<br>41900944-41901012<br>[+] [118]      | Vila-Navarro et al.[93] | 2019 | exogenous cel-miR-39         | plasma | upregulated   | I-IV  | healthy patients           | 0.857 [0.828-0.886] | 87.2% | 76.0% |
| miR-93-5p  | chr7:<br>100093768-100093847<br>[-] [169]     | Vila-Navarro et al.[93] | 2019 | exogenous cel-miR-39         | plasma | upregulated   | I-IV  | healthy patients           | 0.791 [0.755-0.826] | 77.9% | 67.3% |
| miR-133a   | chr18:<br>21825698-21825785<br>[30][31]       | Wang et al. [32]        | 2019 | endogenous RNU6B             | serum  | downregulated | I-III | healthy patients           | 0.893               | 87.2% | 90.6% |

|            |                                                  |                    |      |                                                      |        |             |      |                                            |                         |       |       |
|------------|--------------------------------------------------|--------------------|------|------------------------------------------------------|--------|-------------|------|--------------------------------------------|-------------------------|-------|-------|
| miR-155    | chr21:<br>25573980-<br>25574044<br>[+] [34][35]  | Wang et<br>al.[37] | 2009 | endogenous<br>miRNA-16                               | plasma | upregulated | I-IV | healthy patients                           | 0.67 [ 0.51–0.82]       | -     | -     |
| miR-196a   | chr17:<br>48632490-<br>48632559 [-]<br>[64]      | Wang et<br>al.[37] | 2009 | endogenous<br>miRNA-16                               | plasma | upregulated | I-IV | healthy patients                           | 0.69 [ 0.53–0.84]       | -     | -     |
| miR-21     | chr17:<br>59841266-<br>59841337<br>[+] [82] [83] | Wang et<br>al.[37] | 2009 | endogenous<br>miRNA-16                               | plasma | upregulated | I-IV | healthy patients                           | 0.62 [ 0.45–0.77]       | -     | -     |
| miR-210    | chr11:<br>568089-<br>568198 [-]<br>[87][88]      | Wang et<br>al.[37] | 2009 | endogenous<br>miRNA-16                               | plasma | upregulated | I-IV | healthy patients                           | 0.65 [ 0.49–0.80]       | -     | -     |
| miR-1246   | chr 2:<br>176600980-<br>176601052<br>[19]        | Wei et<br>al.[20]  | 2020 | * three<br>independent<br>experiments                | serum  | upregulated | I-IV | healthy patients,<br>pancreatic<br>disease | 0.81 [ 0.75 -<br>0.87]  | -     | -     |
| miR-1290   | chr1:<br>18897071-<br>18897148 [-]<br>[26]       | Wei et<br>al.[20]  | 2020 | * three<br>independent<br>experiments                | serum  | upregulated | I-IV | healthy patients,<br>pancreatic<br>disease | 0.91 [ 0.87 -<br>0.95]  | -     | -     |
| miR-1290   | chr1:<br>18897071-<br>18897148 [-]<br>[26]       | Xu [27]            | 2021 | endogenous<br>miR-16-5p,<br>exogenous cel-<br>miR-39 | serum  | upregulated | I-IV | healthy patients                           | 0.8857                  | 60.9% | 90.0% |
| miR-126-3p | chr 9:<br>136670602-<br>136670686<br>[+] [21]    | Xu et al.[22]      | 2016 | endogenous<br>RNU6B, miR-<br>16                      | plasma | upregulated | I-IV | healthy patients                           | 0.618 [0.550–<br>0.682] | 61.5% | 60%   |
| miR-486-5p | chr8:<br>41660441-<br>41660508 [-]               | Xu et al.[22]      | 2016 | endogenous<br>RNU6B, miR-<br>16                      | plasma | upregulated | I-IV | healthy patients                           | 0.861 [0.808–<br>0.904] | 75%   | 87.7% |

|          |                                                        |                   |      |                                         |        |             |      |                  |                            |       |        |
|----------|--------------------------------------------------------|-------------------|------|-----------------------------------------|--------|-------------|------|------------------|----------------------------|-------|--------|
|          | [138]                                                  |                   |      |                                         |        |             |      |                  |                            |       |        |
| miR-938  | chr10:<br>29602264-<br>29602346 [-]<br>[170]           | Xu et al.[22]     | 2016 | endogenous<br>RNU6B, miR-<br>16         | plasma | upregulated | I-IV | healthy patients | 0.693 [0.628–<br>0.753]    | 61.5% | 73%    |
| miR-155  | chr21:<br>25573980-<br>25574044<br>[+] [34][35]        | Yu et al [38]     | 2017 | exogenous cel-<br>miR-39                | plasma | upregulated | -    | healthy patients | 0.822 [0.707–<br>0.937]    | -     | -      |
| miR-196a | chr17:<br>48632490-<br>48632559 [-]<br>[64]            | Yu et al [38]     | 2017 | exogenous cel-<br>miR-39                | plasma | upregulated | -    | healthy patients | 0.791 [0.665–<br>0.916]    | -     | -      |
| miR-20a  | chr13:<br>91351065-<br>91351135<br>[+] [80][81]        | Yu et al [38]     | 2017 | exogenous cel-<br>miR-39                | plasma | upregulated | -    | healthy patients | 0.884 [0.790–<br>0.978]    | -     | -      |
| miR-21   | chr17:<br>59841266-<br>59841337<br>[+] [82] [83]       | Yu et al [38]     | 2017 | exogenous cel-<br>miR-39                | plasma | upregulated | -    | healthy patients | 0.845 for<br>[0.740–0.949] | -     | -      |
| miR-210  | chr11:<br>568089-<br>568198 [-]<br>[87][88]            | Yu et al [38]     | 2017 | exogenous cel-<br>miR-39                | plasma | upregulated | -    | healthy patients | 0.687 [0.543–<br>0.831]    | -     | -      |
| miR-25   | chr7:<br>100093560-<br>100093643<br>[-] [107]<br>[108] | Yu et al [38]     | 2017 | exogenous cel-<br>miR-39                | plasma | upregulated | -    | healthy patients | 0.763 [0.635–<br>0.891]    | -     | -      |
| miR-25   | chr7:<br>100093560-<br>100093643<br>[-] [107]<br>[108] | Yu et<br>al.[110] | 2020 | endogenous<br>let-7d, let-7g,<br>let-7i | serum  | upregulated | I-IV | healthy patients | 0.939 [0.903-<br>0.975]    | 82.5% | 93.64% |
| miR-21   | chr17:                                                 | Yuan et           | 2016 | exogenous cel-                          | plasma | upregulated | I-IV | healthy patients | 0.809(0.743-               | -     | -      |

|            |                                                 |                 |      |                      |        |             |      |                  |                         |       |       |
|------------|-------------------------------------------------|-----------------|------|----------------------|--------|-------------|------|------------------|-------------------------|-------|-------|
|            | 59841266-59841337<br>[+] [82] [83]              | al.[86]         |      | miR-39               |        |             |      |                  | 0.875)                  |       |       |
| miR-25     | chr7:<br>100093560-100093643<br>[-] [107] [108] | Yuan et al.[86] | 2016 | exogenous cel-miR-39 | plasma | upregulated | I-IV | healthy patients | 0.655(0.570-0.740)      | -     | -     |
| let-7b-5p  | chr 22:<br>46113686-46113768<br>[2]             | Zou et al. [3]  | 2019 | exogenous cel-miR-39 | serum  | upregulated | I-IV | healthy patients | 0.703<br>[0.636-0.771]  | 79.8% | 59.8% |
| miR-192-5p | chr11:<br>64891137-64891246 [-]<br>[60]         | Zou et al. [3]  | 2019 | exogenous cel-miR-39 | serum  | upregulated | I-IV | healthy patients | 0.684<br>[0.615-0.754], | 77.5% | 57.0% |
| miR-19a-3p | chr13:<br>91350891-91350972<br>[+] [70]         | Zou et al. [3]  | 2019 | exogenous cel-miR-39 | serum  | upregulated | I-IV | healthy patients | 0.771<br>[0.712-0.831]  | 71.3% | 78.5% |
| miR-19b-3p | chr13:<br>91351192-91351278<br>[+] [71]         | Zou et al. [3]  | 2019 | exogenous cel-miR-39 | serum  | upregulated | I-IV | healthy patients | 0.788<br>[0.729-0.846]  | 65.1% | 81.3% |
| miR-223-3p | chrX:<br>66018870-66018979<br>[+] [99]          | Zou et al. [3]  | 2019 | exogenous cel-miR-39 | serum  | upregulated | I-IV | healthy patients | 0.901<br>[0.861-0.941]  | 78.3% | 91.6% |
| miR-25-3p  | chr7:<br>100093560-100093643<br>[-][108]        | Zou et al. [3]  | 2019 | exogenous cel-miR-39 | serum  | upregulated | I-IV | healthy patients | 0.726<br>[0.659-0.792]  | 66.7% | 80.4% |

**Supplementary Table S3.** Diagnostic performance of circulating miRNA panels. CS- clinical stage, PC –pancreatic cancer, AUC – area under the curve, CA19-9 - Carbohydrate antigen 19-9

| Markers included in the panel and their relative levels ↓/↑                                                                                                                                     | Author                | Year | Normalization control                          | Source of sample | CS of PC patients | AUC                    | Sensitivity | Specificity |
|-------------------------------------------------------------------------------------------------------------------------------------------------------------------------------------------------|-----------------------|------|------------------------------------------------|------------------|-------------------|------------------------|-------------|-------------|
| miR-483-3p ↑<br>miR-21 ↑                                                                                                                                                                        | Abue et al.[84]       | 2015 | exogenous cel-miR-39,<br>endogenous miR-16     | plasma           | I-IV              | 0.839                  | -           | -           |
| miR-21 ↑<br>miR-34a ↑                                                                                                                                                                           | Aleamar et al. [85]   | 2016 | exogenous cel-miR-39                           | serum            | I-IV              | 0.894<br>[0.771–1.0]   | -           | -           |
| miR-196b ↑<br>TIMP1 ↑<br>LCN2 ↑                                                                                                                                                                 | Bartsch et al. [68]   | 2018 | endogenous miR-24                              | serum            | I-III             | 0.93 [0.8162 to 1.044] | 80%         | 80%         |
| miRNA-10b ↑<br>miRNA -106b ↑                                                                                                                                                                    | Cote et al. [7]       | 2014 | endogenous miRNA-425-5p                        | plasma           | I-IV              | -                      | 100%        | 100%        |
| miR-8073 ↑<br>miR-642 ↑                                                                                                                                                                         | Fathi et al. [151]    | 2022 | endogenous RNU6B                               | plasma           | -                 | 0.79                   | 77%         | 78%         |
| miR-574-3p ↑ miR-885-5p ↑ miR-144-3p ↓ miR-130b-3p ↑ miR-34a-5p ↑ miR-24-3p ↑ miR-106b-5p ↓ miR-22-5p ↑ miR-451a ↓ let-7d-3p ↑ miR-101-3p ↓ miR-26a-5p ↓ miR-197-3p ↑ miR-423-3p ↑ miR-122-5p ↑ | Franklin et al [5]    | 2018 | endogenous mean expression value normalization | plasma           | I-II              | 0.96 [0.92-1.00]       | -           | -           |
| miR-642b-3p ↑<br>miR -885-5p ↑                                                                                                                                                                  | Ganepola et al. [102] | 2014 | endogenous miR-3196                            | plasma           | IIA-IIB           | 0.97 [0.90-1.00]       | -           | -           |

|                                                                                                                                                      |                         |      |                          |        |      |                            |       |       |
|------------------------------------------------------------------------------------------------------------------------------------------------------|-------------------------|------|--------------------------|--------|------|----------------------------|-------|-------|
| miR- 22-3p↑                                                                                                                                          |                         |      |                          |        |      |                            |       |       |
| miR-607↓<br>CA19.9↑<br>CEA↑                                                                                                                          | Jiang et al.<br>[144]   | 2021 | endogenous<br>RNU6B      | serum  | I-IV | 0.863                      | 76.6% | 83.1% |
| miR-16 ↑<br>miR-24↓<br>miR-27.a↓<br>miR-30a-5p↓<br>miR-323-3p↓<br>miR-20a↑<br>miR-25↓<br>miR-29c↓<br>miR-483-5p ↑                                    | Johansen et<br>al.[176] | 2016 | endogenous<br>controls   | serum  | I-IV | 0.7207                     | -     | -     |
| miR-16↑<br>miR-18.a↑<br>miR-24↓<br>miR-27a↓<br>miR-30a-5p↓<br>miR-323-3p↓<br>miR-20a↑<br>miR-25↓<br>miR-29c↓<br>miR-191↓<br>miR-345↑<br>miR-483-5p ↑ | Johansen et<br>al.[176] | 2016 | endogenous<br>controls   | serum  | I-IV | 0.7237                     |       |       |
| miR-221↑<br>miR-375↓                                                                                                                                 | Kawaguchi<br>et al.[96] | 2013 |                          | plasma | I-IV | 0.762                      | -     | -     |
| miR-215-5p↑<br>miR-122-5p↑<br>miR-192-5p↑<br>miR-30b-5p↓<br>miR-320b↑                                                                                | Khan et<br>al.[18]      | 2021 | exogenous<br>UniSp6      | serum  | I-IV | 0.811<br>[0.744–<br>0.829] | -     | -     |
| miR-492↓<br>miR-663a↓                                                                                                                                | Lin et<br>al.[140]      | 2014 | exogenous cel-miR-<br>39 | serum  | I-IV | 0.869 [0.791-<br>0.947]    | 85.7% | 80.0% |
| miR-181b↑<br>miR-210↑                                                                                                                                | Liu et al. [46]         | 2020 | endogenous<br>RNU6B      | plasma | I-IV | 0.830 [0.743-<br>0.917]    | 80.0% | 70.0% |

|                                                                                                                             |                         |      |                                               |             |      |                            |       |        |
|-----------------------------------------------------------------------------------------------------------------------------|-------------------------|------|-----------------------------------------------|-------------|------|----------------------------|-------|--------|
| miR-196a↑<br>miR-210↑                                                                                                       | Liu et al. [46]         | 2020 | endogenous<br>RNU6B                           | plasma      | I-IV | 0.888 [0.805-<br>0.970]    | 87.5% | 80.0%  |
| miR-181b↑<br>miR-196a↑                                                                                                      | Liu et al. [46]         | 2020 | endogenous<br>RNU6B                           | plasma      | I-IV | 0.944 [0.887-<br>1.001]    | 92.5% | 90.0%  |
| miR-181b↑<br>miR-196a↑<br>miR-210↑                                                                                          | Liu et al. [46]         | 2020 | endogenous<br>RNU6B                           | plasma      | I-IV | 0.968 [0.924-<br>1.011]    | 95.0% | 97.5%  |
| miR-16↑<br>miR-196a↑                                                                                                        | Liu et al. [36]         | 2012 | exogenous<br>cel-miR-39                       | plasma      | I-IV | 0.895<br>[0.850-<br>0.939] | -     | -      |
| miR-16↑<br>miR-196a↑<br>CA19-9↑                                                                                             | Liu et al. [36]         | 2012 | exogenous<br>cel-miR-39                       | plasma      | I-IV | 0.979<br>[0.962-<br>0.996] | 92.0% | 95.6%, |
| miR-20a↑<br>miR-21↑<br>miR-24↑<br>miR-25↑<br>miR-99a↑<br>miR-185↑<br>miR-191↑                                               | Liu et<br>al.[177]      | 2012 | directly normalized<br>to the serum<br>volume | serum       | I-IV | 0.985                      | 94%   | 93%    |
| miR-145↓<br>miR-150↓<br>miR-223↑<br>miR-636↓                                                                                | Schultz et al.<br>[178] | 2014 | endogenous<br>RNU44 and RNU48                 | whole blood | I-IV | 0.88 [0.85-<br>0.92]       | 85%   | 73%    |
| miR-26b↑<br>miR-34a↑<br>miR-122↑<br>miR-126↓<br>miR-145↑<br>miR-150↓<br>miR-223↑<br>miR-505↑<br><br>miR-636↓<br>miR-885-5p↑ | Schultz et al.<br>[178] | 2014 | endogenous<br>RNU44 and RNU48                 | whole blood | I-IV | 0.93 [0.89-<br>0.96]       | 85%   | 86%    |
| miR-196↑                                                                                                                    | Škrha et                | 2016 | endogenous miR-                               | serum       | -    | -                          | 94%   | 82%    |

|                                                                                          |                         |      |                                 |        |         |                     |       |       |
|------------------------------------------------------------------------------------------|-------------------------|------|---------------------------------|--------|---------|---------------------|-------|-------|
| miR-200 ↑<br>CA 19-9↑                                                                    | al.[63]                 |      | 191 and miR-454v                |        |         |                     |       |       |
| miR-196a↑<br>miR-196b↑                                                                   | Slater et al.<br>[65]   | 2014 | endogenous miR-24               | serum  | I,II,IV | 1.00                | 100%  | 100%  |
| miR-210↑<br>miR-21↑<br>CA19-9↑                                                           | Vieira et al.<br>[49]   | 2021 | endogenous RNU-24 and RNU-48    | plasma | I-IV    | 1.00                | 100%  | 100%  |
| miR-33a-3p↑<br>miR-320a↑                                                                 | Vila-Navarro et al.[93] | 2019 | exogenous cel-miR-39            | plasma | I-IV    | 0.906 [0.93-0.88]   | 89%   | 85%   |
| miR-33a-3p↑<br>miR-320a↑<br>CA19-9↑                                                      | Vila-Navarro et al.[93] | 2019 | exogenous cel-miR-39            | plasma | I-IV    | 0.956 [0.97-0.94]   | 86%   | 91%   |
| miR-21↑<br>miR-210↑<br>miR-155↑<br>miR-196a↑                                             | Wang et al.[37]         | 2009 | endogenous miRNA-16             | plasma | I-IV    | 0.82 [ 0.70–0.94]   | 64%   | 89%   |
| miR-1290↑<br>miR-1246↑<br>CA19-9↑                                                        | Wei et al.[20]          | 2020 | * three independent experiments | serum  | I-IV    | 0.97 [0.96-1.00]    | 92.5% | 93.7% |
| miR-25↑<br>MIC-1↑<br>CA19-9↑                                                             | Yuan et al.[86]         | 2016 | exogenous cel-miR-39            | plasma | I-IV    | 0.967 [0.938-0.995] | 84.1% | 100%  |
| miR-21↑<br>MIC-1↑<br>CA19-9↑                                                             | Yuan et al.[86]         | 2016 | exogenous cel-miR-39            | plasma | I-IV    | 0.972 [0.946-0.999] | 87.8% | 98.9% |
| miR-122-5p↑<br>miR-125b-5p↑<br>miR-192-5p↑<br>miR-193b-3p↑<br>miR-221-3p↑<br>miR-27b-3p↑ | Zhou et al.<br>[179]    | 2018 | endogenous miR-103a             | plasma | I-IV    | 0.937 [0.894–0.979] | 88.7% | 89.1% |
| let-7b-5p↑<br>miR-192-5p↑<br>miR-19a-3p↑<br>miR-19b-3p↑<br>miR-223-3p↑                   | Zou et al. [3]          | 2019 | exogenous cel-miR-39            | serum  | I-IV    | 0.978 [0.966-0.998] | 93.3% | 96.0% |



|            |  |  |  |  |  |  |  |  |
|------------|--|--|--|--|--|--|--|--|
| miR-25-3p↑ |  |  |  |  |  |  |  |  |
|------------|--|--|--|--|--|--|--|--|

**Supplementary Table S4.** Diagnostic performance of circulating miRNA compared to CA19-9. CS – clinical stage, PC – pancreatic cancer, AUC –area under the curve, CA19-9 - Carbohydrate antigen 19-9

\* analysis with Abcam Fireplex™ platform

| miRNA  | Author             | Year | Normaliza<br>tion<br>control | Source of<br>sample | Expression<br>level<br>compared<br>to non-<br>cancer<br>controls. | CS of PC<br>patients | Compared<br>with<br>CA19-9<br>alone | AUC in<br>panel with<br>CA19.9 | Sensitivity<br>in panel<br>with<br>CA19-9 | Specificity<br>in panel<br>with<br>CA19-9 |
|--------|--------------------|------|------------------------------|---------------------|-------------------------------------------------------------------|----------------------|-------------------------------------|--------------------------------|-------------------------------------------|-------------------------------------------|
| miR-21 | Abue et<br>al.[84] | 2015 | exogenous cel-<br>miR-39,    | plasma              | upregulated                                                       | I-IV                 | worse results                       | -                              | -                                         | -                                         |

|             |                  |      |                                                                   |        |               |       |                |   |   |   |
|-------------|------------------|------|-------------------------------------------------------------------|--------|---------------|-------|----------------|---|---|---|
|             |                  |      | endogenous miR-16                                                 |        |               |       |                |   |   |   |
| miR-483-3p  | Abue et al.[84]  | 2015 | exogenous cel-miR-39, endogenous miR-16                           | plasma | upregulated   | I-IV  | worse results  | - | - | - |
| miR-1202    | Aita et al. [16] | 2021 | exogenous UniSp6, exogenous spike-in mix (UniSp2, UniSp4, UniSp5) | serum  | downregulated | I-III | better results | - | - | - |
| miR-1275    | Aita et al. [16] | 2021 | exogenous UniSp6, exogenous spike-in mix (UniSp2, UniSp4, UniSp5) | serum  | downregulated | I-III | better results | - | - | - |
| miR-1915-3p | Aita et al. [16] | 2021 | exogenous UniSp6, exogenous spike-in mix (UniSp2, UniSp4, UniSp5) | serum  | upregulated   | I-III | better results | - | - | - |
| miR-2392    | Aita et al. [16] | 2021 | exogenous UniSp6, exogenous spike-in mix (UniSp2, UniSp4, UniSp5) | serum  | downregulated | I-III | better results | - | - | - |
| miR-3135-b  | Aita et al. [16] | 2021 | exogenous UniSp6, exogenous spike-in mix (UniSp2, UniSp4, UniSp5) | serum  | upregulated   | I-III | better results | - | - | - |
| miR-3679-5p | Ait. et al. [16] | 2021 | exogenous UniSp6, exogenous spike-in mix (UniSp2, UniSp4, UniSp5) | serum  | downregulated | I-III | better results | - | - | - |

|             |                  |      |                                                                   |       |               |       |                |   |   |   |
|-------------|------------------|------|-------------------------------------------------------------------|-------|---------------|-------|----------------|---|---|---|
| miR-371b-5p | Aita et al. [16] | 2021 | exogenous UniSp6, exogenous spike-in mix (UniSp2, UniSp4, UniSp5) | serum | upregulated   | I-III | better results | - | - | - |
| miR-4327    | Aita et al. [16] | 2021 | exogenous UniSp6, exogenous spike-in mix (UniSp2, UniSp4, UniSp5) | serum | upregulated   | I-III | better results | - | - | - |
| miR-4466    | Aita et al. [16] | 2021 | exogenous UniSp6, exogenous spike-in mix (UniSp2, UniSp4, UniSp5) | serum | upregulated   | I-III | better results | - | - | - |
| miR-4516    | Aita et al. [16] | 2021 | exogenous UniSp6, exogenous spike-in mix (UniSp2, UniSp4, UniSp5) | serum | upregulated   | I-III | better results | - | - | - |
| miR-4655-3p | Aita et al. [16] | 2021 | exogenous UniSp6, exogenous spike-in mix (UniSp2, UniSp4, UniSp5) | serum | upregulated   | I-III | better results | - | - | - |
| miR-4669    | Aita et al. [16] | 2021 | exogenous UniSp6, exogenous spike-in mix (UniSp2, UniSp4, UniSp5) | serum | downregulated | I-III | better results | - | - | - |
| miR-4687-3p | Aita et al. [16] | 2021 | exogenous UniSp6, exogenous spike-in mix (UniSp2, UniSp4, UniSp5) | serum | upregulated   | I-III | better results | - | - | - |
| miR-5100    | Aita et al.      | 2021 | exogenous                                                         | serum | upregulated   | I-III | better results | - | - | - |

|                 |                     |      |                                                                                |       |               |       |                |   |   |   |
|-----------------|---------------------|------|--------------------------------------------------------------------------------|-------|---------------|-------|----------------|---|---|---|
|                 | [16]                |      | UniSp6,<br>exogenous spike-<br>in mix (UniSp2,<br>UniSp4, UniSp5)              |       |               |       |                |   |   |   |
| miR-574-3p      | Aita et al.<br>[16] | 2021 | exogenous<br>UniSp6,<br>exogenous spike-<br>in mix (UniSp2,<br>UniSp4, UniSp5) | serum | downregulated | I-III | better results | - | - | - |
| miR-6089        | Aita et al.<br>[16] | 2021 | exogenous<br>UniSp6,<br>exogenous spike-<br>in mix (UniSp2,<br>UniSp4, UniSp5) | serum | upregulated   | I-III | better results | - | - | - |
| miR-6125        | Aita et al.<br>[16] | 2021 | exogenous<br>UniSp6,<br>exogenous spike-<br>in mix (UniSp2,<br>UniSp4, UniSp5) | serum | upregulated   | I-III | better results | - | - | - |
| miR-6126        | Aita et al.<br>[16] | 2021 | exogenous<br>UniSp6,<br>exogenous spike-<br>in mix (UniSp2,<br>UniSp4, UniSp5) | serum | upregulated   | I-III | better results | - | - | - |
| miR-6749-<br>5p | Aita et al.<br>[16] | 2021 | exogenous<br>UniSp6,<br>exogenous spike-<br>in mix (UniSp2,<br>UniSp4, UniSp5) | serum | downregulated | I-III | better results | - | - | - |
| miR-6800-<br>5p | Aita et al.<br>[16] | 2021 | exogenous<br>UniSp6,<br>exogenous spike-<br>in mix (UniSp2,<br>UniSp4, UniSp5) | serum | upregulated   | I-III | better results | - | - | - |
| miR-6821-<br>5p | Aita et al.<br>[16] | 2021 | exogenous<br>UniSp6,                                                           | serum | upregulated   | I-III | better results | - | - | - |

|             |                  |      |                                                                   |        |               |       |                |                     |         |         |
|-------------|------------------|------|-------------------------------------------------------------------|--------|---------------|-------|----------------|---------------------|---------|---------|
|             |                  |      | exogenous spike-in mix (UniSp2, UniSp4, UniSp5)                   |        |               |       |                |                     |         |         |
| miR-6850-5p | Aita et al. [16] | 2021 | exogenous UniSp6, exogenous spike-in mix (UniSp2, UniSp4, UniSp5) | serum  | upregulated   | I-III | better results | -                   | -       | -       |
| miR-6869-5p | Aita et al. [16] | 2021 | exogenous UniSp6, exogenous spike-in mix (UniSp2, UniSp4, UniSp5) | serum  | upregulated   | I-III | better results | -                   | -       | -       |
| miR-7107-5p | Aita et al. [16] | 2021 | exogenous UniSp6, exogenous spike-in mix (UniSp2, UniSp4, UniSp5) | serum  | downregulated | I-III | better results | -                   | -       | -       |
| miR-7110-5p | Aita et al. [16] | 2021 | exogenous UniSp6, exogenous spike-in mix (UniSp2, UniSp4, UniSp5) | serum  | downregulated | I-III | better results | -                   | -       | -       |
| miR-8485    | Aita et al. [16] | 2021 | exogenous UniSp6, exogenous spike-in mix (UniSp2, UniSp4, UniSp5) | serum  | downregulated | I-III | better results | -                   | -       | -       |
| miR-939-5p  | Aita et al. [16] | 2021 | exogenous UniSp6, exogenous spike-in mix (UniSp2, UniSp4, UniSp5) | serum  | upregulated   | I-III | better results | -                   | -       | -       |
| miR-182     | Chen et al [55]  | 2014 | endogenous RNU6B                                                  | plasma | upregulated   | I-IV  | better results | 0.837 [0.769–0.894] | 84.68 % | 86.77 % |

|              |                         |      |                                             |        |               |           |                |                        |       |       |
|--------------|-------------------------|------|---------------------------------------------|--------|---------------|-----------|----------------|------------------------|-------|-------|
| miR-25       | Deng et al.[109]        | 2016 | directly normalized to the serum volume     | serum  | upregulated   | I-IV      | better results | -                      | -     | -     |
| miR-130a-3p* | Dittmar et al. [29]     | 2021 | endogenous miR-17-5p, miR-20a-5p, miR-93-5p | plasma | upregulated   | II        | worse results  | 0.94 [0.89-0.98]       | -     | -     |
| miR-222-3p*  | Dittmar et al. [29]     | 2021 | endogenous miR-17-5p, miR-20a-5p, miR-93-5p | plasma | upregulated   | II        | worse results  | 0.92 [0.87-0.97]       | -     | -     |
| miR-34a-5p*  | Dittmar et al. [29]     | 2021 | endogenous miR-17-5p, miR-20a-5p, miR-93-5p | plasma | upregulated   | II        | worse results  | 0.92 [0.86 - 0.97]     | -     | -     |
| miR-22-3p    | Hussein et al.[103]     | 2017 | endogenous miR-3196                         | serum  | upregulated   | IB,IIB,IV | better results | -                      | -     | -     |
| miR-642b-3p  | Hussein et al.[103]     | 2017 | endogenous miR-3196                         | serum  | upregulated   | IB,IIB,IV | better results | -                      | -     | -     |
| miR-885-5p   | Hussein et al.[103]     | 2017 | endogenous miR-3196                         | serum  | upregulated   | IB,IIB,IV | better results | -                      | -     | -     |
| miR-607      | Jiang et al. [144]      | 2021 | endogenous RNU6B                            | serum  | downregulated | I-IV      | better results | -                      | -     | -     |
| miR-181b     | Liu et al. [46]         | 2020 | endogenous RNU6B                            | plasma | upregulated   | I-IV      | worse results  | -                      | -     | -     |
| miR-196a     | Liu et al. [46]         | 2020 | endogenous RNU6B                            | plasma | upregulated   | I-IV      | worse results  | -                      | -     | -     |
| miR-210      | Liu et al. [46]         | 2020 | endogenous RNU6B                            | plasma | upregulated   | I-IV      | worse results  | -                      | -     | -     |
| miR-629      | Shi et al.[150]         | 2018 | -                                           | serum  | upregulated   | I-IV      | better results | 0.812 [0.733 - 0.8927] | -     | -     |
| miR-205      | Traeger et al. [79]     | 2018 | exogenous cel-miR-39                        | serum  | upregulated   | II-IV     | worse results  | 0.890 [0.782–0.995]    | 86.7% | 93.3% |
| miR-210      | Vieira et al. [49]      | 2021 | endogenous RNU-24 and RNU-48                | plasma | upregulated   | I-IV      | worse results  | 0.99                   | -     | -     |
| miR-21-5p    | Vila-Navarro et al.[93] | 2019 | exogenous cel-miR-39                        | plasma | upregulated   | I-IV      | better results | -                      | -     | -     |

|             |                         |      |                                   |        |             |      |                |                     |        |        |
|-------------|-------------------------|------|-----------------------------------|--------|-------------|------|----------------|---------------------|--------|--------|
| miR-320a    | Vila-Navarro et al.[93] | 2019 | exogenous cel-miR-39              | plasma | upregulated | I-IV | better results | -                   | -      | -      |
| miR-33a-3p  | Vila-Navarro et al.[93] | 2019 | exogenous cel-miR-39              | plasma | upregulated | I-IV | better results | -                   | -      | -      |
| miR-93-5p   | Vila-Navarro et al.[93] | 2019 | exogenous cel-miR-39              | plasma | upregulated | I-IV | worse results  | -                   | -      | -      |
| miR-1246    | Wei et al.[20]          | 2020 | * three independent experiments   | serum  | upregulated | I-IV | worse results  | 0.93 [0.89-0.96]    | 85.8 % | 86.2 % |
| miR-1290    | Wei et al.[20]          | 2020 | * three independent experiments   | serum  | upregulated | I-IV | better results | 0.96 [0.94-0.99]    | 84.2 % | 96.2 % |
| miR-25      | Yu et al.[110]          | 2020 | endogenous let-7d, let-7g, let-7i | serum  | upregulated | I-IV | better results | 0.985 [0.972-0.998] | -      | -      |
| miR-21      | Yuan et al.[86]         | 2016 | exogenous cel-miR-39              | plasma | upregulated | I-IV | worse results  | -                   | -      | -      |
| miR-25      | Yuan et al.[86]         | 2016 | exogenous cel-miR-39              | plasma | upregulated | I-IV | worse results  | -                   | -      | -      |
| miR-122-5p  | Zhou et al. [179]       | 2018 | endogenous miR-103a               | plasma | upregulated | I-IV | -              | 0.81 [0.762–0.859]  | -      | -      |
| miR-125b-5p | Zhou et al. [179]       | 2018 | endogenous miR-103a               | plasma | upregulated | I-IV | -              | 0.646 [0.585–0.707] | -      | -      |
| miR-192-5p  | Zhou et al. [179]       | 2018 | endogenous miR-103a               | plasma | upregulated | I-IV | -              | 0.693 [0.634–0.753] | -      | -      |
| miR-193b-3p | Zhou et al. [179]       | 2018 | endogenous miR-103a               | plasma | upregulated | I-IV | -              | 0.775 [0.722–0.828] | -      | -      |
| miR-221-3p  | Zhou et al. [179]       | 2018 | endogenous miR-103a               | plasma | upregulated | I-IV | -              | 0.625 [0.562–0.688] | -      | -      |
| miR-27b-3p  | Zhou et al.             | 2018 | endogenous                        | plasma | upregulated | I-IV | -              | 0.656               | -      | -      |

|  |       |  |          |  |  |  |  |               |  |  |
|--|-------|--|----------|--|--|--|--|---------------|--|--|
|  | [179] |  | miR-103a |  |  |  |  | [0.594–0.718] |  |  |
|--|-------|--|----------|--|--|--|--|---------------|--|--|

**Supplementary Table S5.** Prognostic performance of circulating miRNA. OS-overall survival

\*-in unresectable patients

†-in patients undergoing pancreatoduodenectomy

| miRNA        | Author             | Year | Normalization control                   | Source of sample | Expression level compared to non-cancer controls. | Prognosis with increased level of miRNA expression | OS with high levels of expression in months | OS with low levels of expression in months | Univariate analysis p value | Multivariate analysis p value |
|--------------|--------------------|------|-----------------------------------------|------------------|---------------------------------------------------|----------------------------------------------------|---------------------------------------------|--------------------------------------------|-----------------------------|-------------------------------|
| miR-21*      | Abue et al.[84]    | 2015 | exogenous cel-miR-39, endogenous miR-16 | plasma           | upregulated                                       | poor                                               | 3.0                                         | 13.8                                       | <b>p=0.005</b>              | -                             |
| let-7a       | Ali et al.[180]    | 2015 | -                                       | plasma           | downregulated                                     | good                                               | -                                           | -                                          | p=0.063                     | -                             |
| miR-508      | Ali et al.[180]    | 2015 | -                                       | plasma           | upregulated                                       | poor                                               | -                                           | -                                          | p=0.212                     | -                             |
| let-7d       | Ali et al.[181]    | 2010 | endogenous miR-16                       | plasma           | downregulated                                     | good                                               | -                                           | -                                          | -                           | <b>p=0.0044</b>               |
| miR-21       | Ali et al.[181]    | 2010 | endogenous miR-16                       | plasma           | upregulated                                       | poor                                               | -                                           | -                                          | -                           | <b>p=0.0032</b>               |
| miR-182      | Chen et al [55]    | 2014 | endogenous RNU6B                        | plasma           | upregulated                                       | poor                                               | 25.023, [22.122–27.878]                     | 37.025, [32.753–41.247]                    | <b>p=0.001</b>              | <b>p&lt;0.001</b>             |
| miR-200c-3p† | Gablo et al. [182] | 2020 | endogenous miR-93-5p                    | plasma           | -                                                 | poor                                               | -                                           | -                                          | <b>p =0.012</b>             | -                             |
| miR-365a-3p† | Gablo et al. [182] | 2020 | endogenous miR-93-5p                    | plasma           | -                                                 | good                                               | -                                           | -                                          | <b>p =0.013</b>             | -                             |
| miR-99a-5p†  | Gablo et           | 2020 | endogenous miR-                         | plasma           | -                                                 | good                                               | -                                           | -                                          | <b>p =0.006</b>             | -                             |



|            |                           |      |                                         |        |               |      |                  |                    |                  |                  |
|------------|---------------------------|------|-----------------------------------------|--------|---------------|------|------------------|--------------------|------------------|------------------|
|            | al. [182]                 |      | 93-5p                                   |        |               |      |                  |                    |                  |                  |
| miR-373    | Hua et al.[125]           | 2017 | endogenous RNU6B                        | serum  | downregulated | good | -                | -                  | -                | <b>p=0.014</b>   |
| miR-107    | Imamura et al.[12]        | 2017 | exogenous cel-miR-39                    | plasma | downregulated | good | -                | -                  | <b>p=0.0038</b>  | <b>p=0.0424</b>  |
| miR-607†   | Jiang et al. [144]        | 2021 | endogenous RNU6B                        | serum  | downregulated | good | -                | -                  | <b>p=0.011</b>   | <b>p=0.036</b>   |
| miR-21-5p† | Karasek et al. [24]       | 2018 | endogenous miR-106a                     | plasma | upregulated   | poor | -                | -                  | <b>p=0.0499</b>  | <b>p=0.0379</b>  |
| miR-196a   | Kong et al. [183]         | 2011 | exogenous cel-miR-39                    | serum  | upregulated   | poor | 6.1 [ 4.49–7.72] | 12.0 [ 5.92–18.08] | <b>p = 0.007</b> |                  |
| miR-21     | Liu et al.[177]           | 2012 | directly normalized to the serum volume | serum  | upregulated   | poor | -                | -                  | <b>p=0.02</b>    | <b>p=0.00</b>    |
| miR-744    | Miyamae et al.[165]       | 2015 | exogenous cel-miR-39                    | plasma | upregulated   | poor | -                | -                  | <b>p=0.0063</b>  | <b>p=0.0007†</b> |
| miR-629    | Shi et al.[150]           | 2018 | -                                       | serum  | upregulated   | poor | -                | -                  | <b>p=0.001</b>   | <b>p=0.006</b>   |
| miR-100    | Stroese et al. [9]        | 2018 | exogenous cel-miR-39                    | serum  | upregulated   | poor | -                | -                  | <b>p = 0.002</b> | <b>p = 0.046</b> |
| miR-21     | Stroese et al.[9]         | 2018 | exogenous cel-miR-39                    | serum  | upregulated   | poor | -                | -                  | <b>p = 0.001</b> | <b>p = 0.004</b> |
| miR-205    | Traeger et al. [79]       | 2018 | exogenous cel-miR-39                    | serum  | upregulated   | poor | 6.93             | 11.93              | p = 0.176        | -                |
| miR-17-3p  | Van der Sijde et al.[184] | 2021 | endogenous miR-26a-5p, miR-30b-5p       | serum  | -             | -    | -                | -                  | <b>p = 0.032</b> | p = 0.192        |
| miR-194-5p | Van der Sijde et al.[184] | 2021 | endogenous miR-26a-5p, miR-30b-5p       | serum  | -             | -    | -                | -                  | p = 0.145        | -                |
| miR-373-3p | Van der Sijde et al.[184] | 2021 | endogenous miR-26a-5p, miR-30b-5p       | serum  | -             | -    | -                | -                  | p = 0.141        | -                |
| miR-21     | Wang et al. [185]         | 2013 | exogenous cel-miR-39                    | serum  | upregulated   | poor | 6.2              | 11.6               | <b>p = 0.002</b> | <b>p = 0.008</b> |
| miR-196a   | Yu et al                  | 2017 | exogenous cel-                          | plasma | upregulated   | poor | 6.3 [ 2.3–10.3]  | 12.5 [10.0–        | <b>p=0.001</b>   | <b>p=0.013</b>   |

|             |                      |      |                          |        |             |      |                       |                      |                  |                |
|-------------|----------------------|------|--------------------------|--------|-------------|------|-----------------------|----------------------|------------------|----------------|
|             | [38]                 |      | miR-39                   |        |             |      |                       | 15.0]                |                  |                |
| miR-210     | Yu et al<br>[38]     | 2017 | exogenous cel-<br>miR-39 | plasma | upregulated | good | 11.7 [ 6.8–<br>16.5]  | 6.6 [ 5.3–7.9]       | <b>p = 0.003</b> | <b>p=0.021</b> |
| miR-21      | Yuan et<br>al.[86]   | 2016 | exogenous cel-<br>miR-39 | plasma | upregulated | good | 8.30 [5.69-<br>10.91] | 7.30 [5.94-<br>8.66] | p=0.768          | -              |
| miR-25      | Yuan et<br>al.[86]   | 2016 | exogenous cel-<br>miR-39 | plasma | upregulated | good | 8.30 [4.73-<br>11.87] | 7.30[6.04-<br>8.56]  | p= 0.759         | -              |
| miR-125b-5p | Zhou et<br>al. [179] | 2018 | endogenous miR-<br>103a  | plasma | upregulated | good | -                     | -                    | <b>p=0.004</b>   | <b>p=0.011</b> |
| miR-19a-3p  | Zou et al.<br>[3]    | 2019 | exogenous cel-<br>miR-39 | serum  | upregulated | poor | -                     | -                    | <b>p=0.036</b>   | <b>p=0.042</b> |

## References:

- [1] E. S. Lee and J. M. Lee, "Imaging diagnosis of pancreatic cancer: A state-of-the-art review," *World J. Gastroenterol.*, vol. 20, no. 24, p. 7864, Jun. 2014.
- [2] "miRDB Search Result." [Online]. Available: <https://mirdb.org/cgi-bin/search.cgi?searchType=miRNA&full=mirbase&searchBox=MIMAT0000063>. [Accessed: 26-Feb-

2023].

- [3] X. Zou *et al.*, "Identification of a six-miRNA panel in serum benefiting pancreatic cancer diagnosis," *Cancer Med.*, vol. 8, no. 6, pp. 2810–2822, Jun. 2019.
- [4] "miRDB Search Result." [Online]. Available: <https://mirdb.org/cgi-bin/search.cgi?searchType=miRNA&full=mirbase&searchBox=MIMAT0000065>. [Accessed: 26-Feb-2023].
- [5] O. Franklin *et al.*, "Plasma Micro-RNA Alterations Appear Late in Pancreatic Cancer," *Ann. Surg.*, vol. 267, no. 4, p. 775, Apr. 2018.
- [6] "miRDB Search Result." [Online]. Available: <https://mirdb.org/cgi-bin/search.cgi?searchType=miRNA&full=mirbase&searchBox=MIMAT0000680>. [Accessed: 26-Feb-2023].
- [7] G. A. Cote *et al.*, "A pilot study to develop a diagnostic test for pancreatic ductal adenocarcinoma based on differential expression of select miRNA in plasma and bile," *Am. J. Gastroenterol.*, vol. 109, no. 12, pp. 1942–1952, Dec. 2014.
- [8] "miRDB Search Result." [Online]. Available: <https://mirdb.org/cgi-bin/search.cgi?searchType=miRNA&full=mirbase&searchBox=MIMAT0000098>. [Accessed: 26-Feb-2023].
- [9] A. J. Stroese, H. Ullerich, G. Koehler, V. Raetzel, N. Senninger, and S. A. Dhayat, "Circulating microRNA-99 family as liquid biopsy marker in pancreatic adenocarcinoma," *J. Cancer Res. Clin. Oncol.*, vol. 144, no. 12, pp. 2377–2390, Dec. 2018.
- [10] "miRDB Search Result." [Online]. Available: <https://mirdb.org/cgi-bin/search.cgi?searchType=miRNA&full=mirbase&searchBox=MIMAT0000099>. [Accessed: 26-Feb-2023].
- [11] "miRDB Search Result." [Online]. Available: <https://mirdb.org/cgi-bin/search.cgi?searchType=miRNA&full=mirbase&searchBox=MIMAT0000104>. [Accessed: 26-Feb-2023].
- [12] T. Imamura *et al.*, "Depleted tumor suppressor miR-107 in plasma relates to tumor progression and is a novel therapeutic target in pancreatic cancer," *Sci. Rep.*, vol. 7, no. 1, Dec. 2017.
- [13] "miRDB Search Result." [Online]. Available: <https://mirdb.org/cgi-bin/search.cgi?searchType=miRNA&full=mirbase&searchBox=MIMAT0000254>. [Accessed: 26-Feb-2023].
- [14] "miRDB Search Result." [Online]. Available: <https://mirdb.org/cgi-bin/search.cgi?searchType=miRNA&full=mirbase&searchBox=MIMAT0004556>. [Accessed: 26-Feb-2023].
- [15] "miRDB Search Result." [Online]. Available: <https://mirdb.org/cgi-bin/search.cgi?searchType=miRNA&full=mirbase&searchBox=MIMAT0005865>. [Accessed: 26-Feb-2023].
- [16] A. Aita *et al.*, "Serum miRNA Profiling for Early PDAC Diagnosis and Prognosis: A Retrospective Study," *Biomedicines*, vol. 9, no. 7, Jul. 2021.
- [17] "miRDB Search Result." [Online]. Available: <https://mirdb.org/cgi-bin/search.cgi?searchType=miRNA&full=mirbase&searchBox=MIMAT0000421>. [Accessed: 26-Feb-2023].
- [18] I. A. Khan *et al.*, "Panel of serum miRNAs as potential non-invasive biomarkers for pancreatic ductal adenocarcinoma," *Sci. Rep.*, vol. 11, no. 1, Dec. 2021.
- [19] "miRDB Search Result." [Online]. Available: <https://mirdb.org/cgi-bin/search.cgi?searchType=miRNA&full=mirbase&searchBox=MIMAT0005898>. [Accessed: 26-Feb-2023].
- [20] J. Wei, L. Yang, Y. N. Wu, and J. Xu, "Serum miR-1290 and miR-1246 as Potential Diagnostic Biomarkers of Human Pancreatic Cancer," *J. Cancer*, vol. 11, no. 6, pp. 1325–1333, 2020.
- [21] "miRDB Search Result." [Online]. Available: <https://mirdb.org/cgi-bin/search.cgi?searchType=miRNA&full=mirbase&searchBox=MIMAT0000445>. [Accessed: 26-Feb-2023].
- [22] J. Xu *et al.*, "Plasma miRNAs Effectively Distinguish Patients With Pancreatic Cancer From Controls: A Multicenter Study," *Ann. Surg.*, vol. 263, no. 6, pp. 1173–1179, 2016.

- [23] "miRDB Search Result." [Online]. Available: <https://mirdb.org/cgi-bin/search.cgi?searchType=miRNA&full=mirbase&searchBox=MIMAT0000444>. [Accessed: 26-Feb-2023].
- [24] P. Karasek *et al.*, "Pre-operative Plasma miR-21-5p Is a Sensitive Biomarker and Independent Prognostic Factor in Patients with Pancreatic Ductal Adenocarcinoma Undergoing Surgical Resection," *Cancer Genomics Proteomics*, vol. 15, no. 4, pp. 321–327, Jul. 2018.
- [25] "miRDB Search Result." [Online]. Available: <https://mirdb.org/cgi-bin/search.cgi?searchType=miRNA&full=mirbase&searchBox=MIMAT0005929>. [Accessed: 26-Feb-2023].
- [26] "miRDB Search Result." [Online]. Available: <https://mirdb.org/cgi-bin/search.cgi?searchType=miRNA&full=mirbase&searchBox=MIMAT0005880>. [Accessed: 26-Feb-2023].
- [27] L. Xu, Y. Cai, X. Chen, Y. Zhu, and J. Cai, "Circulating MiR-1290 as a potential diagnostic and disease monitoring biomarker of human gastrointestinal tumors," *BMC Cancer*, vol. 21, no. 1, Dec. 2021.
- [28] "miRDB Search Result." [Online]. Available: <https://mirdb.org/cgi-bin/search.cgi?searchType=miRNA&full=mirbase&searchBox=MIMAT0000425>. [Accessed: 26-Feb-2023].
- [29] R. L. Dittmar *et al.*, "Plasma MicroRNA Biomarkers in Limited Volume Samples for Detection of Early Stage Pancreatic Cancer," *Cancer Prev. Res. (Phila.)*, vol. 14, no. 7, p. 729, Jul. 2021.
- [30] "miRDB Search Result." [Online]. Available: <https://mirdb.org/cgi-bin/search.cgi?searchType=miRNA&full=mirbase&searchBox=MIMAT0026478>. [Accessed: 26-Feb-2023].
- [31] "miRDB Search Result." [Online]. Available: <https://mirdb.org/cgi-bin/search.cgi?searchType=miRNA&full=mirbase&searchBox=MIMAT0000427>. [Accessed: 26-Feb-2023].
- [32] Z. Wang, "Diagnostic performance for declined microRNA-133a in pancreatic cancer," *J. Cell. Biochem.*, vol. 121, no. 8–9, pp. 3882–3886, Aug. 2019.
- [33] "miRDB Search Result." [Online]. Available: <https://mirdb.org/cgi-bin/search.cgi?searchType=miRNA&full=mirbase&searchBox=MIMAT0000436>. [Accessed: 26-Feb-2023].
- [34] "miRDB Search Result." [Online]. Available: <https://mirdb.org/cgi-bin/search.cgi?searchType=miRNA&full=mirbase&searchBox=MIMAT0000646>. [Accessed: 26-Feb-2023].
- [35] "miRDB Search Result." [Online]. Available: <https://mirdb.org/cgi-bin/search.cgi?searchType=miRNA&full=mirbase&searchBox=MIMAT0004658>. [Accessed: 26-Feb-2023].
- [36] J. Liu *et al.*, "Combination of plasma microRNAs with serum CA19-9 for early detection of pancreatic cancer," *Int. J. cancer*, vol. 131, no. 3, pp. 683–691, Aug. 2012.
- [37] J. Wang *et al.*, "MicroRNAs in plasma of pancreatic ductal adenocarcinoma patients as novel blood-based biomarkers of disease," *Cancer Prev. Res. (Phila.)*, vol. 2, no. 9, pp. 807–813, Sep. 2009.
- [38] Q. Yu *et al.*, "Evaluation of Plasma MicroRNAs as Diagnostic and Prognostic Biomarkers in Pancreatic Adenocarcinoma: miR-196a and miR-210 Could Be Negative and Positive Prognostic Markers, Respectively," *Biomed Res. Int.*, vol. 2017, 2017.
- [39] "miRDB Search Result." [Online]. Available: <https://mirdb.org/cgi-bin/search.cgi?searchType=miRNA&full=mirbase&searchBox=MIMAT0000069>. [Accessed: 26-Feb-2023].
- [40] "miRDB Search Result." [Online]. Available: <https://mirdb.org/cgi-bin/search.cgi?searchType=miRNA&full=mirbase&searchBox=MIMAT0004489>. [Accessed: 26-Feb-2023].
- [41] "miRDB Search Result." [Online]. Available: <https://mirdb.org/cgi-bin/search.cgi?searchType=miRNA&full=mirbase&searchBox=MIMAT0000070>. [Accessed: 26-Feb-2023].
- [42] "miRDB Search Result." [Online]. Available: <https://mirdb.org/cgi-bin/search.cgi?searchType=miRNA&full=mirbase&searchBox=MIMAT0000256>. [Accessed: 26-Feb-

2023].

- [43] "miRDB Search Result." [Online]. Available: <https://mirdb.org/cgi-bin/search.cgi?searchType=miRNA&full=mirbase&searchBox=MIMAT0000270>. [Accessed: 26-Feb-2023].
- [44] "miRDB Search Result." [Online]. Available: <https://mirdb.org/cgi-bin/search.cgi?searchType=miRNA&full=mirbase&searchBox=MIMAT0000257>. [Accessed: 26-Feb-2023].
- [45] "miRDB Search Result." [Online]. Available: <https://mirdb.org/cgi-bin/search.cgi?searchType=miRNA&full=mirbase&searchBox=MIMAT0022692>. [Accessed: 26-Feb-2023].
- [46] G. Liu, C. Shao, A. Li, X. Zhang, X. Guo, and J. Li, "Diagnostic Value of Plasma miR-181b, miR-196a, and miR-210 Combination in Pancreatic Cancer," *Gastroenterol. Res. Pract.*, vol. 2020, 2020.
- [47] "miRDB Search Result." [Online]. Available: <https://mirdb.org/cgi-bin/search.cgi?searchType=miRNA&full=mirbase&searchBox=MIMAT0000258>. [Accessed: 26-Feb-2023].
- [48] "miRDB Search Result." [Online]. Available: <https://mirdb.org/cgi-bin/search.cgi?searchType=miRNA&full=mirbase&searchBox=MIMAT0004559>. [Accessed: 26-Feb-2023].
- [49] N. F. Vieira *et al.*, "The role of circulating miRNAs and CA19-9 in pancreatic cancer diagnosis," *Oncotarget*, vol. 12, no. 17, pp. 1638–1650, Aug. 2021.
- [50] "miRDB Search Result." [Online]. Available: <https://mirdb.org/cgi-bin/search.cgi?searchType=miRNA&full=mirbase&searchBox=MIMAT0002821>. [Accessed: 26-Feb-2023].
- [51] "miRDB Search Result." [Online]. Available: <https://mirdb.org/cgi-bin/search.cgi?searchType=miRNA&full=mirbase&searchBox=MIMAT0026608>. [Accessed: 26-Feb-2023].
- [52] M. Akamatsu *et al.*, "Specific MAPK-Associated MicroRNAs in Serum Differentiate Pancreatic Cancer from Autoimmune Pancreatitis," *PLoS One*, vol. 11, no. 7, Jul. 2016.
- [53] "miRDB Search Result." [Online]. Available: <https://mirdb.org/cgi-bin/search.cgi?searchType=miRNA&full=mirbase&searchBox=MIMAT0000260>. [Accessed: 26-Feb-2023].
- [54] "miRDB Search Result." [Online]. Available: <https://mirdb.org/cgi-bin/search.cgi?searchType=miRNA&full=mirbase&searchBox=MIMAT0000259>. [Accessed: 26-Feb-2023].
- [55] Q. Chen, L. Yang, • Yilei, X. • Jianxin, • Z., and Z. Li, "Circulating microRNA-182 in plasma and its potential diagnostic and prognostic value for pancreatic cancer," *Med. Oncol.* 2014 3111, vol. 31, no. 11, pp. 1–8, Oct. 2014.
- [56] "miRDB Search Result." [Online]. Available: <https://mirdb.org/cgi-bin/search.cgi?searchType=miRNA&full=mirbase&searchBox=MIMAT0000072>. [Accessed: 26-Feb-2023].
- [57] "miRDB Search Result." [Online]. Available: <https://mirdb.org/cgi-bin/search.cgi?searchType=miRNA&full=mirbase&searchBox=MIMAT0002891>. [Accessed: 26-Feb-2023].
- [58] R. Morimura *et al.*, "Novel diagnostic value of circulating miR-18a in plasma of patients with pancreatic cancer," *Br. J. Cancer*, vol. 105, no. 11, pp. 1733–1740, Nov. 2011.
- [59] "miRDB Search Result." [Online]. Available: <https://mirdb.org/cgi-bin/search.cgi?searchType=miRNA&full=mirbase&searchBox=MIMAT0007892>. [Accessed: 26-Feb-2023].
- [60] "miRDB Search Result." [Online]. Available: <https://mirdb.org/cgi-bin/search.cgi?searchType=miRNA&full=mirbase&searchBox=MIMAT0000222>. [Accessed: 26-Feb-2023].
- [61] "miRDB Search Result." [Online]. Available: <https://mirdb.org/cgi-bin/search.cgi?searchType=miRNA&full=mirbase&searchBox=MIMAT0004767>. [Accessed: 26-Feb-2023].

- [62] "miRDB Search Result." [Online]. Available: <https://mirdb.org/cgi-bin/search.cgi?searchType=miRNA&full=mirbase&searchBox=MIMAT0002819>. [Accessed: 26-Feb-2023].
- [63] P. Škrha *et al.*, "Serum microRNA-196 and microRNA-200 in pancreatic ductal adenocarcinoma of patients with diabetes mellitus," *Pancreatology*, vol. 16, no. 5, pp. 839–843, Sep. 2016.
- [64] "miRDB Search Result." [Online]. Available: <https://mirdb.org/cgi-bin/search.cgi?searchType=miRNA&full=mirbase&searchBox=MIMAT0000226>. [Accessed: 26-Feb-2023].
- [65] E. P. Slater *et al.*, "MicroRNA-196a and -196b as Potential Biomarkers for the Early Detection of Familial Pancreatic Cancer," *Transl. Oncol.*, vol. 7, no. 4, pp. 464–471, 2014.
- [66] "miRDB Search Result." [Online]. Available: <https://mirdb.org/cgi-bin/search.cgi?searchType=miRNA&full=mirbase&searchBox=MIMAT0001080>. [Accessed: 26-Feb-2023].
- [67] "miRDB Search Result." [Online]. Available: <https://mirdb.org/cgi-bin/search.cgi?searchType=miRNA&full=mirbase&searchBox=MIMAT0009201>. [Accessed: 26-Feb-2023].
- [68] D. K. Bartsch *et al.*, "The Combination of MiRNA-196b, LCN2, and TIMP1 is a Potential Set of Circulating Biomarkers for Screening Individuals at Risk for Familial Pancreatic Cancer," *J. Clin. Med.*, vol. 7, no. 10, Oct. 2018.
- [69] "miRDB Search Result." [Online]. Available: <https://mirdb.org/cgi-bin/search.cgi?searchType=miRNA&full=mirbase&searchBox=MIMAT0000227>. [Accessed: 26-Feb-2023].
- [70] "miRDB Search Result." [Online]. Available: <https://mirdb.org/cgi-bin/search.cgi?searchType=miRNA&full=mirbase&searchBox=MIMAT0000073>. [Accessed: 26-Feb-2023].
- [71] "miRDB Search Result." [Online]. Available: <https://mirdb.org/cgi-bin/search.cgi?searchType=miRNA&full=mirbase&searchBox=MIMAT0000074>. [Accessed: 26-Feb-2023].
- [72] "miRDB Search Result." [Online]. Available: <https://mirdb.org/cgi-bin/search.cgi?searchType=miRNA&full=mirbase&searchBox=MIMAT0001620>. [Accessed: 26-Feb-2023].
- [73] "miRDB Search Result." [Online]. Available: <https://mirdb.org/cgi-bin/search.cgi?searchType=miRNA&full=mirbase&searchBox=MIMAT0000682>. [Accessed: 26-Feb-2023].
- [74] A. Li *et al.*, "Pancreatic cancers epigenetically silence SIP1 and hypomethylate and overexpress miR-200a/200b in association with elevated circulating miR-200a and miR-200b levels," *Cancer Res.*, vol. 70, no. 13, pp. 5226–5237, Jul. 2010.
- [75] "miRDB Search Result." [Online]. Available: <https://mirdb.org/cgi-bin/search.cgi?searchType=miRNA&full=mirbase&searchBox=MIMAT0004571>. [Accessed: 26-Feb-2023].
- [76] "miRDB Search Result." [Online]. Available: <https://mirdb.org/cgi-bin/search.cgi?searchType=miRNA&full=mirbase&searchBox=MIMAT0000318>. [Accessed: 26-Feb-2023].
- [77] "miRDB Search Result." [Online]. Available: <https://mirdb.org/cgi-bin/search.cgi?searchType=miRNA&full=mirbase&searchBox=MIMAT0000266>. [Accessed: 26-Feb-2023].
- [78] "miRDB Search Result." [Online]. Available: <https://mirdb.org/cgi-bin/search.cgi?searchType=miRNA&full=mirbase&searchBox=MIMAT0009197>. [Accessed: 26-Feb-2023].
- [79] M. Michael Traeger *et al.*, "The ambiguous role of microRNA-205 and its clinical potential in pancreatic ductal adenocarcinoma," *J. Cancer Res. Clin. Oncol.*, vol. 144, no. 12, pp. 2419–2431, Dec. 2018.
- [80] "miRDB Search Result." [Online]. Available: <https://mirdb.org/cgi-bin/search.cgi?searchType=miRNA&full=mirbase&searchBox=MIMAT0004493>. [Accessed: 26-Feb-

2023].

- [81] "miRDB Search Result." [Online]. Available: <https://mirdb.org/cgi-bin/search.cgi?searchType=miRNA&full=mirbase&searchBox=MIMAT0000075>. [Accessed: 26-Feb-2023].
- [82] "miRDB Search Result." [Online]. Available: <https://mirdb.org/cgi-bin/search.cgi?searchType=miRNA&full=mirbase&searchBox=MIMAT0000076>. [Accessed: 26-Feb-2023].
- [83] "miRDB Search Result." [Online]. Available: <https://mirdb.org/cgi-bin/search.cgi?searchType=miRNA&full=mirbase&searchBox=MIMAT0004494>. [Accessed: 26-Feb-2023].
- [84] M. Abue *et al.*, "Circulating miR-483-3p and miR-21 is highly expressed in plasma of pancreatic cancer," *Int. J. Oncol.*, vol. 46, no. 2, p. 539, Feb. 2015.
- [85] B. Alemar *et al.*, "miRNA-21 and miRNA-34a Are Potential Minimally Invasive Biomarkers for the Diagnosis of Pancreatic Ductal Adenocarcinoma," *Pancreas*, vol. 45, no. 1, pp. 84–92, Jan. 2016.
- [86] W. Yuan *et al.*, "New combined microRNA and protein plasmatic biomarker panel for pancreatic cancer," *Oncotarget*, vol. 7, no. 48, pp. 80033–80045, 2016.
- [87] "miRDB Search Result." [Online]. Available: <https://mirdb.org/cgi-bin/search.cgi?searchType=miRNA&full=mirbase&searchBox=MIMAT0026475>. [Accessed: 26-Feb-2023].
- [88] "miRDB Search Result." [Online]. Available: <https://mirdb.org/cgi-bin/search.cgi?searchType=miRNA&full=mirbase&searchBox=MIMAT0000267>. [Accessed: 26-Feb-2023].
- [89] "miRDB Search Result." [Online]. Available: <https://mirdb.org/cgi-bin/search.cgi?searchType=miRNA&full=mirbase&searchBox=MIMAT0000269>. [Accessed: 26-Feb-2023].
- [90] "miRDB Search Result." [Online]. Available: <https://mirdb.org/cgi-bin/search.cgi?searchType=miRNA&full=mirbase&searchBox=MIMAT0022695>. [Accessed: 26-Feb-2023].
- [91] "miRDB Search Result." [Online]. Available: <https://mirdb.org/cgi-bin/search.cgi?searchType=miRNA&full=mirbase&searchBox=MIMAT0000272>. [Accessed: 26-Feb-2023].
- [92] K. Qu *et al.*, "Circulating miRNA-21-5p as a diagnostic biomarker for pancreatic cancer: evidence from comprehensive miRNA expression profiling analysis and clinical validation," *Sci. Rep.*, vol. 7, no. 1, Dec. 2017.
- [93] E. Vila-Navarro *et al.*, "Novel Circulating miRNA Signatures for Early Detection of Pancreatic Neoplasia," *Clin. Transl. Gastroenterol.*, vol. 10, no. 4, Apr. 2019.
- [94] "miRDB Search Result." [Online]. Available: <https://mirdb.org/cgi-bin/search.cgi?searchType=miRNA&full=mirbase&searchBox=MIMAT0004568>. [Accessed: 26-Feb-2023].
- [95] "miRDB Search Result." [Online]. Available: <https://mirdb.org/cgi-bin/search.cgi?searchType=miRNA&full=mirbase&searchBox=MIMAT0000278>. [Accessed: 26-Feb-2023].
- [96] T. Kawaguchi *et al.*, "Clinical impact of circulating miR-221 in plasma of patients with pancreatic cancer," *Br. J. Cancer*, vol. 108, no. 2, pp. 361–369, Feb. 2013.
- [97] "miRDB Search Result." [Online]. Available: <https://mirdb.org/cgi-bin/search.cgi?searchType=miRNA&full=mirbase&searchBox=MIMAT0000279>. [Accessed: 26-Feb-2023].
- [98] "miRDB Search Result." [Online]. Available: <https://mirdb.org/cgi-bin/search.cgi?searchType=miRNA&full=mirbase&searchBox=MIMAT0004570>. [Accessed: 26-Feb-2023].
- [99] "miRDB Search Result." [Online]. Available: <https://mirdb.org/cgi-bin/search.cgi?searchType=miRNA&full=mirbase&searchBox=MIMAT0000280>. [Accessed: 26-Feb-2023].
- [100] S. Komatsu *et al.*, "Malignant potential in pancreatic neoplasm; new insights provided by circulating miR-223 in plasma," *Expert Opin. Biol. Ther.*, vol. 15, no. 6, pp. 773–785, Jun. 2015.

- [101] "miRDB Search Result." [Online]. Available: <https://mirdb.org/cgi-bin/search.cgi?searchType=miRNA&full=mirbase&searchBox=MIMAT0000077>. [Accessed: 26-Feb-2023].
- [102] G. A. Ganepola, J. R. Rutledge, P. Suman, A. Yiengpruksawan, and D. H. Chang, "Novel blood-based microRNA biomarker panel for early diagnosis of pancreatic cancer," *World J. Gastrointest. Oncol.*, vol. 6, no. 1, pp. 22–33, Jan. 2014.
- [103] N. A. E. M. Hussein, Z. A. E. Kholy, M. M. Anwar, M. A. Ahmad, and S. M. Ahmad, "Plasma miR-22-3p, miR-642b-3p and miR-885-5p as diagnostic biomarkers for pancreatic cancer," *J. Cancer Res. Clin. Oncol.*, vol. 143, no. 1, pp. 83–93, Jan. 2017.
- [104] "miRDB Search Result." [Online]. Available: <https://mirdb.org/cgi-bin/search.cgi?searchType=miRNA&full=mirbase&searchBox=MIMAT0004495>. [Accessed: 26-Feb-2023].
- [105] "miRDB Search Result." [Online]. Available: <https://mirdb.org/cgi-bin/search.cgi?searchType=miRNA&full=mirbase&searchBox=MIMAT0019043>. [Accessed: 26-Feb-2023].
- [106] "miRDB Search Result." [Online]. Available: <https://mirdb.org/cgi-bin/search.cgi?searchType=miRNA&full=mirbase&searchBox=MIMAT0000080>. [Accessed: 26-Feb-2023].
- [107] "miRDB Search Result." [Online]. Available: <https://mirdb.org/cgi-bin/search.cgi?searchType=miRNA&full=mirbase&searchBox=MIMAT0004498>. [Accessed: 26-Feb-2023].
- [108] "miRDB Search Result." [Online]. Available: <https://mirdb.org/cgi-bin/search.cgi?searchType=miRNA&full=mirbase&searchBox=MIMAT0000081>. [Accessed: 26-Feb-2023].
- [109] T. Deng *et al.*, "Identification of Circulating MiR-25 as a Potential Biomarker for Pancreatic Cancer Diagnosis," *Cell. Physiol. Biochem.*, vol. 39, no. 5, pp. 1716–1722, Nov. 2016.
- [110] Y. Yu, Y. Tong, A. Zhong, Y. Wang, R. Lu, and L. Guo, "Identification of Serum microRNA-25 as a novel biomarker for pancreatic cancer," *Medicine (Baltimore)*, vol. 99, no. 52, Dec. 2020.
- [111] "miRDB Search Result." [Online]. Available: <https://mirdb.org/cgi-bin/search.cgi?searchType=miRNA&full=mirbase&searchBox=MIMAT0000082>. [Accessed: 26-Feb-2023].
- [112] "miRDB Search Result." [Online]. Available: <https://mirdb.org/cgi-bin/search.cgi?searchType=miRNA&full=mirbase&searchBox=MIMAT0000420>. [Accessed: 26-Feb-2023].
- [113] "miRDB Search Result." [Online]. Available: <https://mirdb.org/cgi-bin/search.cgi?searchType=miRNA&full=mirbase&searchBox=MIMAT0000244>. [Accessed: 26-Feb-2023].
- [114] "miRDB Search Result." [Online]. Available: <https://mirdb.org/cgi-bin/search.cgi?searchType=miRNA&full=mirbase&searchBox=MIMAT0004674>. [Accessed: 26-Feb-2023].
- [115] "miRDB Search Result." [Online]. Available: <https://mirdb.org/cgi-bin/search.cgi?searchType=miRNA&full=mirbase&searchBox=MIMAT0018985>. [Accessed: 26-Feb-2023].
- [116] "miRDB Search Result." [Online]. Available: <https://mirdb.org/cgi-bin/search.cgi?searchType=miRNA&full=mirbase&searchBox=MIMAT0000510>. [Accessed: 26-Feb-2023].
- [117] "miRDB Search Result." [Online]. Available: <https://mirdb.org/cgi-bin/search.cgi?searchType=miRNA&full=mirbase&searchBox=MIMAT0005792>. [Accessed: 26-Feb-2023].
- [118] "miRDB Search Result." [Online]. Available: <https://mirdb.org/cgi-bin/search.cgi?searchType=miRNA&full=mirbase&searchBox=MIMAT0004506>. [Accessed: 26-Feb-2023].
- [119] "miRDB Search Result." [Online]. Available: <https://mirdb.org/cgi-bin/search.cgi?searchType=miRNA&full=mirbase&searchBox=MIMAT0000255>. [Accessed: 26-Feb-



2023].

- [120] "miRDB Search Result." [Online]. Available: <https://mirdb.org/cgi-bin/search.cgi?searchType=miRNA&full=mirbase&searchBox=MIMAT0004557>. [Accessed: 26-Feb-2023].
- [121] "miRDB Search Result." [Online]. Available: <https://mirdb.org/cgi-bin/search.cgi?searchType=miRNA&full=mirbase&searchBox=MIMAT0018104>. [Accessed: 26-Feb-2023].
- [122] "miRDB Search Result." [Online]. Available: <https://mirdb.org/cgi-bin/search.cgi?searchType=miRNA&full=mirbase&searchBox=MIMAT0019892>. [Accessed: 26-Feb-2023].
- [123] "miRDB Search Result." [Online]. Available: <https://mirdb.org/cgi-bin/search.cgi?searchType=miRNA&full=mirbase&searchBox=MIMAT0000725>. [Accessed: 26-Feb-2023].
- [124] "miRDB Search Result." [Online]. Available: <https://mirdb.org/cgi-bin/search.cgi?searchType=miRNA&full=mirbase&searchBox=MIMAT0000726>. [Accessed: 26-Feb-2023].
- [125] Y. Hua *et al.*, "Low serum miR-373 predicts poor prognosis in patients with pancreatic cancer," *Cancer Biomark.*, vol. 20, no. 1, pp. 95–100, 2017.
- [126] "miRDB Search Result." [Online]. Available: <https://mirdb.org/cgi-bin/search.cgi?searchType=miRNA&full=mirbase&searchBox=MIMAT0000728>. [Accessed: 26-Feb-2023].
- [127] "miRDB Search Result." [Online]. Available: <https://mirdb.org/cgi-bin/search.cgi?searchType=miRNA&full=mirbase&searchBox=MIMAT0001340>. [Accessed: 26-Feb-2023].
- [128] "miRDB Search Result." [Online]. Available: <https://mirdb.org/cgi-bin/search.cgi?searchType=miRNA&full=mirbase&searchBox=MIMAT0001536>. [Accessed: 26-Feb-2023].
- [129] W. T. Huang, T. S. Lin, J. Y. Wu, J. M. Hong, Y. L. Chen, and F. N. Qiu, "Evaluation of miR-429 as a novel serum biomarker for pancreatic ductal adenocarcinoma and analysis its tumor suppressor function and target genes," *Eur. Rev. Med. Pharmacol. Sci.*, vol. 26, no. 13, pp. 4638–4653, 2022.
- [130] "miRDB Search Result." [Online]. Available: <https://mirdb.org/cgi-bin/search.cgi?searchType=miRNA&full=mirbase&searchBox=MIMAT0016889>. [Accessed: 26-Feb-2023].
- [131] "miRDB Search Result." [Online]. Available: <https://mirdb.org/cgi-bin/search.cgi?searchType=miRNA&full=mirbase&searchBox=MIMAT0018993>. [Accessed: 26-Feb-2023].
- [132] "miRDB Search Result." [Online]. Available: <https://mirdb.org/cgi-bin/search.cgi?searchType=miRNA&full=mirbase&searchBox=MIMAT0019053>. [Accessed: 26-Feb-2023].
- [133] "miRDB Search Result." [Online]. Available: <https://mirdb.org/cgi-bin/search.cgi?searchType=miRNA&full=mirbase&searchBox=MIMAT0001631>. [Accessed: 26-Feb-2023].
- [134] "miRDB Search Result." [Online]. Available: <https://mirdb.org/cgi-bin/search.cgi?searchType=miRNA&full=mirbase&searchBox=MIMAT0019722>. [Accessed: 26-Feb-2023].
- [135] "miRDB Search Result." [Online]. Available: <https://mirdb.org/cgi-bin/search.cgi?searchType=miRNA&full=mirbase&searchBox=MIMAT0019749>. [Accessed: 26-Feb-2023].
- [136] "miRDB Search Result." [Online]. Available: <https://mirdb.org/cgi-bin/search.cgi?searchType=miRNA&full=mirbase&searchBox=MIMAT0019775>. [Accessed: 26-Feb-2023].
- [137] "miRDB Search Result." [Online]. Available: <https://mirdb.org/cgi-bin/search.cgi?searchType=miRNA&full=mirbase&searchBox=MIMAT0002173>. [Accessed: 26-Feb-2023].
- [138] "miRDB Search Result." [Online]. Available: <https://mirdb.org/cgi-bin/search.cgi?searchType=miRNA&full=mirbase&searchBox=MIMAT0002177>. [Accessed: 26-Feb-

2023].

- [139] "miRDB Search Result." [Online]. Available: <https://mirdb.org/cgi-bin/search.cgi?searchType=miRNA&full=mirbase&searchBox=MIMAT0002812>. [Accessed: 26-Feb-2023].
- [140] M. S. Lin, W. C. Chen, J. X. Huang, H. J. Gao, and H. H. Sheng, "Aberrant expression of microRNAs in serum may identify individuals with pancreatic cancer," *Int. J. Clin. Exp. Med.*, vol. 7, no. 12, pp. 5226–5234, Dec. 2014.
- [141] "miRDB Search Result." [Online]. Available: <https://mirdb.org/cgi-bin/search.cgi?searchType=miRNA&full=mirbase&searchBox=MIMAT0022259>. [Accessed: 26-Feb-2023].
- [142] "miRDB Search Result." [Online]. Available: <https://mirdb.org/cgi-bin/search.cgi?searchType=miRNA&full=mirbase&searchBox=MIMAT0003239>. [Accessed: 26-Feb-2023].
- [143] "miRDB Search Result." [Online]. Available: <https://mirdb.org/cgi-bin/search.cgi?searchType=miRNA&full=mirbase&searchBox=MIMAT0003275>. [Accessed: 26-Feb-2023].
- [144] D. Jiang, X. Yuan, J. Ni, L. Shen, M. Cai, and L. Xu, "Low Serum miR-607 Level as a Potential Diagnostic and Prognostic Biomarker in Patients of Pancreatic Ductal Adenocarcinoma: A Preliminary Study," *Can. J. Gastroenterol. Hepatol.*, vol. 2021, 2021.
- [145] "miRDB Search Result." [Online]. Available: <https://mirdb.org/cgi-bin/search.cgi?searchType=miRNA&full=mirbase&searchBox=MIMAT0023714>. [Accessed: 26-Feb-2023].
- [146] "miRDB Search Result." [Online]. Available: <https://mirdb.org/cgi-bin/search.cgi?searchType=miRNA&full=mirbase&searchBox=MIMAT0024598>. [Accessed: 26-Feb-2023].
- [147] "miRDB Search Result." [Online]. Available: <https://mirdb.org/cgi-bin/search.cgi?searchType=miRNA&full=mirbase&searchBox=MIMAT0024599>. [Accessed: 26-Feb-2023].
- [148] "miRDB Search Result." [Online]. Available: <https://mirdb.org/cgi-bin/search.cgi?searchType=miRNA&full=mirbase&searchBox=MIMAT0004810>. [Accessed: 26-Feb-2023].
- [149] "miRDB Search Result." [Online]. Available: <https://mirdb.org/cgi-bin/search.cgi?searchType=miRNA&full=mirbase&searchBox=MIMAT0003298>. [Accessed: 26-Feb-2023].
- [150] W. Shi, Y. Lu, R. Gong, J. J. Sun, and G. Liu, "Serum miR-629 is a novel molecular marker for diagnosis and the prognosis of pancreatic cancer," *Eur. Rev. Med. Pharmacol. Sci.*, vol. 22, no. 16, pp. 5187–5193, 2018.
- [151] M. Fathi, H. A. Aghdaie, S. Ghafouri-Fard, and R. Shams, "Evaluation of potential of miR-8073 and miR-642 as diagnostic markers in pancreatic cancer," *Mol. Biol. Rep.*, vol. 49, no. 7, pp. 6475–6481, Jul. 2022.
- [152] "miRDB Search Result." [Online]. Available: <https://mirdb.org/cgi-bin/search.cgi?searchType=miRNA&full=mirbase&searchBox=MIMAT0018444>. [Accessed: 26-Feb-2023].
- [153] "miRDB Search Result." [Online]. Available: <https://mirdb.org/cgi-bin/search.cgi?searchType=miRNA&full=mirbase&searchBox=MIMAT0003326>. [Accessed: 26-Feb-2023].
- [154] "miRDB Search Result." [Online]. Available: <https://mirdb.org/cgi-bin/search.cgi?searchType=miRNA&full=mirbase&searchBox=MIMAT0027398>. [Accessed: 26-Feb-2023].
- [155] "miRDB Search Result." [Online]. Available: <https://mirdb.org/cgi-bin/search.cgi?searchType=miRNA&full=mirbase&searchBox=MIMAT0027500>. [Accessed: 26-Feb-2023].
- [156] "miRDB Search Result." [Online]. Available: <https://mirdb.org/cgi-bin/search.cgi?searchType=miRNA&full=mirbase&searchBox=MIMAT0027542>. [Accessed: 26-Feb-2023].

- [157] "miRDB Search Result." [Online]. Available: <https://mirdb.org/cgi-bin/search.cgi?searchType=miRNA&full=mirbase&searchBox=MIMAT0027600>. [Accessed: 26-Feb-2023].
- [158] "miRDB Search Result." [Online]. Available: <https://mirdb.org/cgi-bin/search.cgi?searchType=miRNA&full=mirbase&searchBox=MIMAT0027638>. [Accessed: 26-Feb-2023].
- [159] "miRDB Search Result." [Online]. Available: <https://mirdb.org/cgi-bin/search.cgi?searchType=miRNA&full=mirbase&searchBox=MIMAT0000252>. [Accessed: 26-Feb-2023].
- [160] "miRDB Search Result." [Online]. Available: <https://mirdb.org/cgi-bin/search.cgi?searchType=miRNA&full=mirbase&searchBox=MIMAT0004553>. [Accessed: 26-Feb-2023].
- [161] "miRDB Search Result." [Online]. Available: <https://mirdb.org/cgi-bin/search.cgi?searchType=miRNA&full=mirbase&searchBox=MIMAT0028111>. [Accessed: 26-Feb-2023].
- [162] "miRDB Search Result." [Online]. Available: <https://mirdb.org/cgi-bin/search.cgi?searchType=miRNA&full=mirbase&searchBox=MIMAT0028117>. [Accessed: 26-Feb-2023].
- [163] "miRDB Search Result." [Online]. Available: <https://mirdb.org/cgi-bin/search.cgi?searchType=miRNA&full=mirbase&searchBox=MIMAT0004945>. [Accessed: 26-Feb-2023].
- [164] "miRDB Search Result." [Online]. Available: <https://mirdb.org/cgi-bin/search.cgi?searchType=miRNA&full=mirbase&searchBox=MIMAT0004946>. [Accessed: 26-Feb-2023].
- [165] M. Miyamae *et al.*, "Plasma microRNA profiles: identification of miR-744 as a novel diagnostic and prognostic biomarker in pancreatic cancer," *Br. J. Cancer*, vol. 113, no. 10, pp. 1467–1476, Nov. 2015.
- [166] "miRDB Search Result." [Online]. Available: <https://mirdb.org/cgi-bin/search.cgi?searchType=miRNA&full=mirbase&searchBox=MIMAT0031000>. [Accessed: 26-Feb-2023].
- [167] "miRDB Search Result." [Online]. Available: <https://mirdb.org/cgi-bin/search.cgi?searchType=miRNA&full=mirbase&searchBox=MIMAT0033692>. [Accessed: 26-Feb-2023].
- [168] "miRDB Search Result." [Online]. Available: <https://mirdb.org/cgi-bin/search.cgi?searchType=miRNA&full=mirbase&searchBox=MIMAT0004947>. [Accessed: 26-Feb-2023].
- [169] "miRDB Search Result." [Online]. Available: <https://mirdb.org/cgi-bin/search.cgi?searchType=miRNA&full=mirbase&searchBox=MIMAT0000093>. [Accessed: 26-Feb-2023].
- [170] "miRDB Search Result." [Online]. Available: <https://mirdb.org/cgi-bin/search.cgi?searchType=miRNA&full=mirbase&searchBox=MIMAT0004981>. [Accessed: 26-Feb-2023].
- [171] "miRDB Search Result." [Online]. Available: <https://mirdb.org/cgi-bin/search.cgi?searchType=miRNA&full=mirbase&searchBox=MIMAT0004982>. [Accessed: 26-Feb-2023].
- [172] "miRDB Search Result." [Online]. Available: <https://mirdb.org/cgi-bin/search.cgi?searchType=miRNA&full=mirbase&searchBox=MIMAT0000097>. [Accessed: 26-Feb-2023].
- [173] "miRDB Search Result." [Online]. Available: <https://mirdb.org/cgi-bin/search.cgi?searchType=miRNA&full=mirbase&searchBox=MIMAT0004511>. [Accessed: 26-Feb-2023].
- [174] "miRDB Search Result." [Online]. Available: <https://mirdb.org/cgi-bin/search.cgi?searchType=miRNA&full=mirbase&searchBox=MIMAT0000689>. [Accessed: 26-Feb-2023].
- [175] "miRDB Search Result." [Online]. Available: <https://mirdb.org/cgi-bin/search.cgi?searchType=miRNA&full=mirbase&searchBox=MIMAT0004678>. [Accessed: 26-Feb-

2023].

- [176] J. S. Johansen *et al.*, "The potential diagnostic value of serum microRNA signature in patients with pancreatic cancer," *Int. J. cancer*, vol. 139, no. 10, pp. 2312–2324, Nov. 2016.
- [177] R. Liu *et al.*, "Serum microRNA expression profile as a biomarker in the diagnosis and prognosis of pancreatic cancer," *Clin. Chem.*, vol. 58, no. 3, pp. 610–618, Mar. 2012.
- [178] N. A. Schultz *et al.*, "MicroRNA biomarkers in whole blood for detection of pancreatic cancer," *JAMA*, vol. 311, no. 4, pp. 392–404, Jan. 2014.
- [179] X. Zhou, Z. Lu, T. Wang, Z. Huang, W. Zhu, and Y. Miao, "Plasma miRNAs in diagnosis and prognosis of pancreatic cancer: A miRNA expression analysis," *Gene*, vol. 673, pp. 181–193, Oct. 2018.
- [180] A. S. D. H, B. RE, and S. FH, "Differential Expression of MicroRNAs in Tissues and Plasma Co-exists as a Biomarker for Pancreatic Cancer," *J. Cancer Sci. Ther.*, vol. 7, no. 11, 2015.
- [181] S. Ali, K. Almhanna, W. Chen, P. A. Philip, and F. H. Sarkar, "Differentially expressed miRNAs in the plasma may provide a molecular signature for aggressive pancreatic cancer," *Am. J. Transl. Res.*, vol. 3, no. 1, pp. 28–47, 2010.
- [182] N. Gablo *et al.*, "Identification and Validation of Circulating Micrornas as Prognostic Biomarkers in Pancreatic Ductal Adenocarcinoma Patients Undergoing Surgical Resection," *J. Clin. Med.*, vol. 9, no. 8, pp. 1–12, Aug. 2020.
- [183] X. Kong *et al.*, "Detection of differentially expressed microRNAs in serum of pancreatic ductal adenocarcinoma patients: miR-196a could be a potential marker for poor prognosis," *Dig. Dis. Sci.*, vol. 56, no. 2, pp. 602–609, Feb. 2011.
- [184] F. van der Sijde *et al.*, "Serum miR-373-3p and miR-194-5p Are Associated with Early Tumor Progression during FOLFIRINOX Treatment in Pancreatic Cancer Patients: A Prospective Multicenter Study," *Int. J. Mol. Sci.*, vol. 22, no. 20, Oct. 2021.
- [185] P. Wang *et al.*, "The serum miR-21 level serves as a predictor for the chemosensitivity of advanced pancreatic cancer, and miR-21 expression confers chemoresistance by targeting FasL," *Mol. Oncol.*, vol. 7, no. 3, pp. 334–345, 2013.
